# Supplementary material for: Synthesis and Antimalarial Evaluation of Halogenated Analogues of Thiaplakortone A
Source: MDPI journal article supplement (doi:10.3390/md21050317), 2023-05-22
Supplement: s1 [file s1]

# Synthesis and Antimalarial Evaluation of Halogenated Analogues of Thiaplakortone A

Folake A. Egbewande <sup>1</sup>, Brett D. Schwartz <sup>1</sup>, Sandra Duffy <sup>1,2</sup>, Vicky M. Avery <sup>1,2</sup>  
and Rohan A. Davis <sup>1,3,\*</sup>

<sup>1</sup> Griffith Institute for Drug Discovery, School of Environment and Science, Griffith University, Brisbane, QLD 4111, Australia

<sup>2</sup> Discovery Biology, Centre for Cellular Phenomics, Griffith University, Nathan, QLD 4111, Australia

<sup>3</sup> NatureBank, Griffith University, Nathan, QLD 4111, Australia

\*Correspondence: r.davis@griffith.edu.au

## Table of Contents

|      |                                                                                  |    |
|------|----------------------------------------------------------------------------------|----|
| S1:  | <sup>1</sup> H NMR Spectrum for Compound 3 in DMSO- <i>d</i> <sub>6</sub> .....  | 4  |
| S2:  | <sup>13</sup> C NMR Spectrum for Compound 3 in DMSO- <i>d</i> <sub>6</sub> ..... | 4  |
| S3:  | COSY NMR Spectrum for Compound 3 in DMSO- <i>d</i> <sub>6</sub> .....            | 5  |
| S4:  | HSQC NMR Spectrum for Compound 3 in DMSO- <i>d</i> <sub>6</sub> .....            | 5  |
| S5:  | HMBC NMR Spectrum for Compound 3 in DMSO- <i>d</i> <sub>6</sub> .....            | 6  |
| S6:  | <sup>1</sup> H NMR Spectrum for Compound 4 in DMSO- <i>d</i> <sub>6</sub> .....  | 7  |
| S7:  | <sup>13</sup> C NMR Spectrum for Compound 4 in DMSO- <i>d</i> <sub>6</sub> ..... | 7  |
| S8:  | COSY NMR Spectrum for Compound 4 in DMSO- <i>d</i> <sub>6</sub> .....            | 8  |
| S9:  | HSQC NMR Spectrum for Compound 4 in DMSO- <i>d</i> <sub>6</sub> .....            | 8  |
| S10: | HMBC NMR Spectrum for Compound 4 in DMSO- <i>d</i> <sub>6</sub> .....            | 9  |
| S11: | <sup>1</sup> H NMR Spectrum for Compound 5 in DMSO- <i>d</i> <sub>6</sub> .....  | 10 |
| S12: | <sup>13</sup> C NMR Spectrum for Compound 5 in DMSO- <i>d</i> <sub>6</sub> ..... | 10 |
| S13: | COSY NMR Spectrum for Compound 5 in DMSO- <i>d</i> <sub>6</sub> .....            | 11 |
| S14: | HSQC NMR Spectrum for Compound 5 in DMSO- <i>d</i> <sub>6</sub> .....            | 11 |
| S15: | HMBC NMR Spectrum for Compound 5 in DMSO- <i>d</i> <sub>6</sub> .....            | 12 |
| S16: | <sup>1</sup> H NMR Spectrum for Compound 6 in DMSO- <i>d</i> <sub>6</sub> .....  | 13 |
| S17: | <sup>13</sup> C NMR Spectrum for Compound 6 in DMSO- <i>d</i> <sub>6</sub> ..... | 13 |
| S18: | COSY NMR Spectrum for Compound 6 in DMSO- <i>d</i> <sub>6</sub> .....            | 14 |
| S19: | HSQC NMR Spectrum for Compound 6 in DMSO- <i>d</i> <sub>6</sub> .....            | 14 |
| S20: | HMBC NMR Spectrum for Compound 6 in DMSO- <i>d</i> <sub>6</sub> .....            | 15 |
| S21: | <sup>1</sup> H NMR Spectrum for Compound 7 in DMSO- <i>d</i> <sub>6</sub> .....  | 16 |
| S22: | <sup>13</sup> C NMR Spectrum for Compound 7 in DMSO- <i>d</i> <sub>6</sub> ..... | 16 |
| S23: | COSY NMR Spectrum for Compound 7 in DMSO- <i>d</i> <sub>6</sub> .....            | 17 |
| S24: | HSQC NMR Spectrum for Compound 7 in DMSO- <i>d</i> <sub>6</sub> .....            | 17 |
| S25: | HMBC NMR Spectrum for Compound 7 in DMSO- <i>d</i> <sub>6</sub> .....            | 18 |
| S26: | <sup>1</sup> H NMR Spectrum for Compound 8 in DMSO- <i>d</i> <sub>6</sub> .....  | 19 |
| S27: | <sup>13</sup> C NMR Spectrum for Compound 8 in DMSO- <i>d</i> <sub>6</sub> ..... | 19 |
| S28: | COSY NMR Spectrum for Compound 8 in DMSO- <i>d</i> <sub>6</sub> .....            | 20 |
| S29: | HSQC NMR Spectrum for Compound 8 in DMSO- <i>d</i> <sub>6</sub> .....            | 20 |
| S30: | HMBC NMR Spectrum for Compound 8 in DMSO- <i>d</i> <sub>6</sub> .....            | 21 |
| S31: | <sup>1</sup> H NMR Spectrum for Compound 9 in DMSO- <i>d</i> <sub>6</sub> .....  | 22 |

|      |                                                                                |    |
|------|--------------------------------------------------------------------------------|----|
| S32: | $^{13}\text{C}$ NMR Spectrum for Compound <b>9</b> in $\text{DMSO-}d_6$ .....  | 22 |
| S33: | COSY NMR Spectrum for Compound <b>9</b> in $\text{DMSO-}d_6$ .....             | 23 |
| S34: | HSQC NMR Spectrum for Compound <b>9</b> in $\text{DMSO-}d_6$ .....             | 23 |
| S35: | HMBC NMR Spectrum for Compound <b>9</b> in $\text{DMSO-}d_6$ .....             | 24 |
| S36: | $^1\text{H}$ NMR Spectrum for Compound <b>10</b> in $\text{DMSO-}d_6$ .....    | 25 |
| S37: | $^{13}\text{C}$ NMR Spectrum for Compound <b>10</b> in $\text{DMSO-}d_6$ ..... | 25 |
| S38: | COSY NMR Spectrum for Compound <b>10</b> in $\text{DMSO-}d_6$ .....            | 26 |
| S39: | HSQC NMR Spectrum for Compound <b>10</b> in $\text{DMSO-}d_6$ .....            | 26 |
| S40: | HMBC NMR Spectrum for Compound <b>10</b> in $\text{DMSO-}d_6$ .....            | 27 |
| S41: | $^1\text{H}$ NMR Spectrum for Compound <b>11</b> in $\text{DMSO-}d_6$ .....    | 28 |
| S42: | $^{13}\text{C}$ NMR Spectrum for Compound <b>11</b> in $\text{DMSO-}d_6$ ..... | 28 |
| S43: | COSY NMR Spectrum for Compound <b>11</b> in $\text{DMSO-}d_6$ .....            | 29 |
| S44: | HSQC NMR Spectrum for Compound <b>11</b> in $\text{DMSO-}d_6$ .....            | 29 |
| S45: | HMBC NMR Spectrum for Compound <b>11</b> in $\text{DMSO-}d_6$ .....            | 30 |
| S46: | Synthetic Route for Thiaplakortone A (HCl Salt).....                           | 31 |

**S1:**  $^1\text{H}$  NMR Spectrum for Compound **3** in  $\text{DMSO-}d_6$

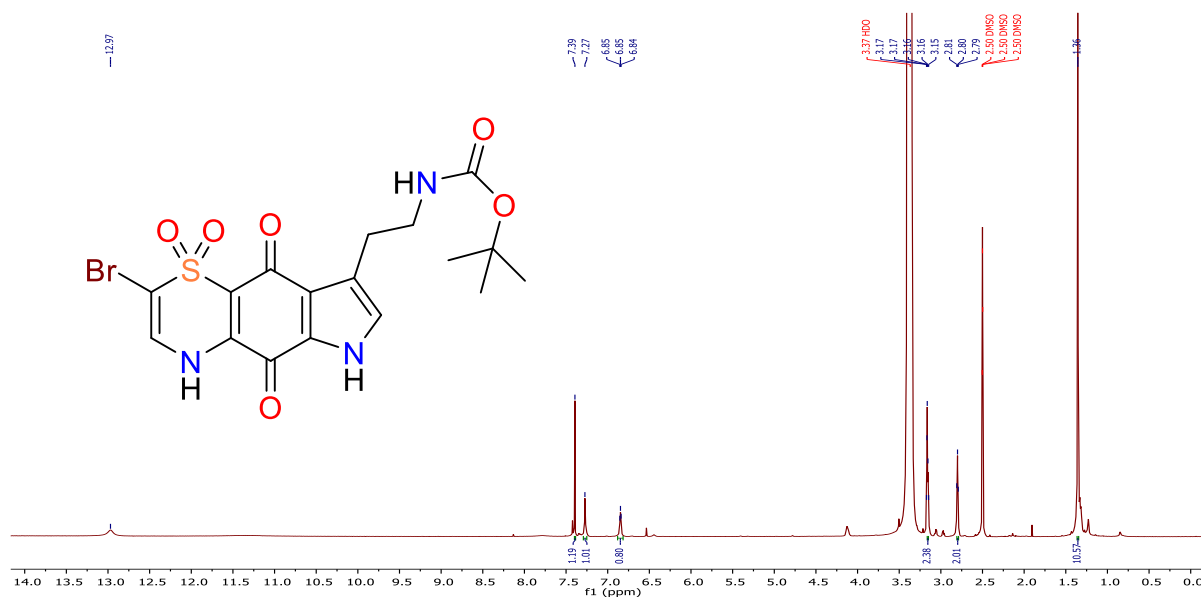

**S2:**  $^{13}\text{C}$  NMR Spectrum for Compound **3** in  $\text{DMSO-}d_6$

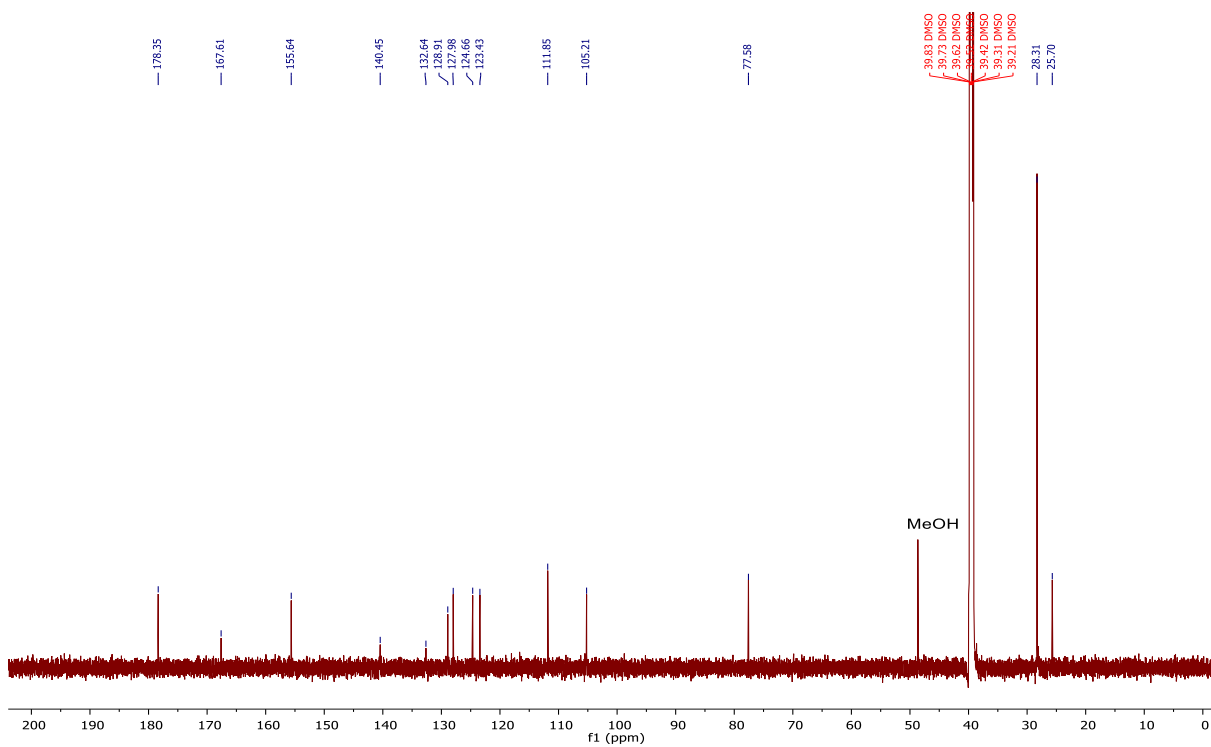

S3: COSY NMR Spectrum for Compound **3** in DMSO-*d*<sub>6</sub>

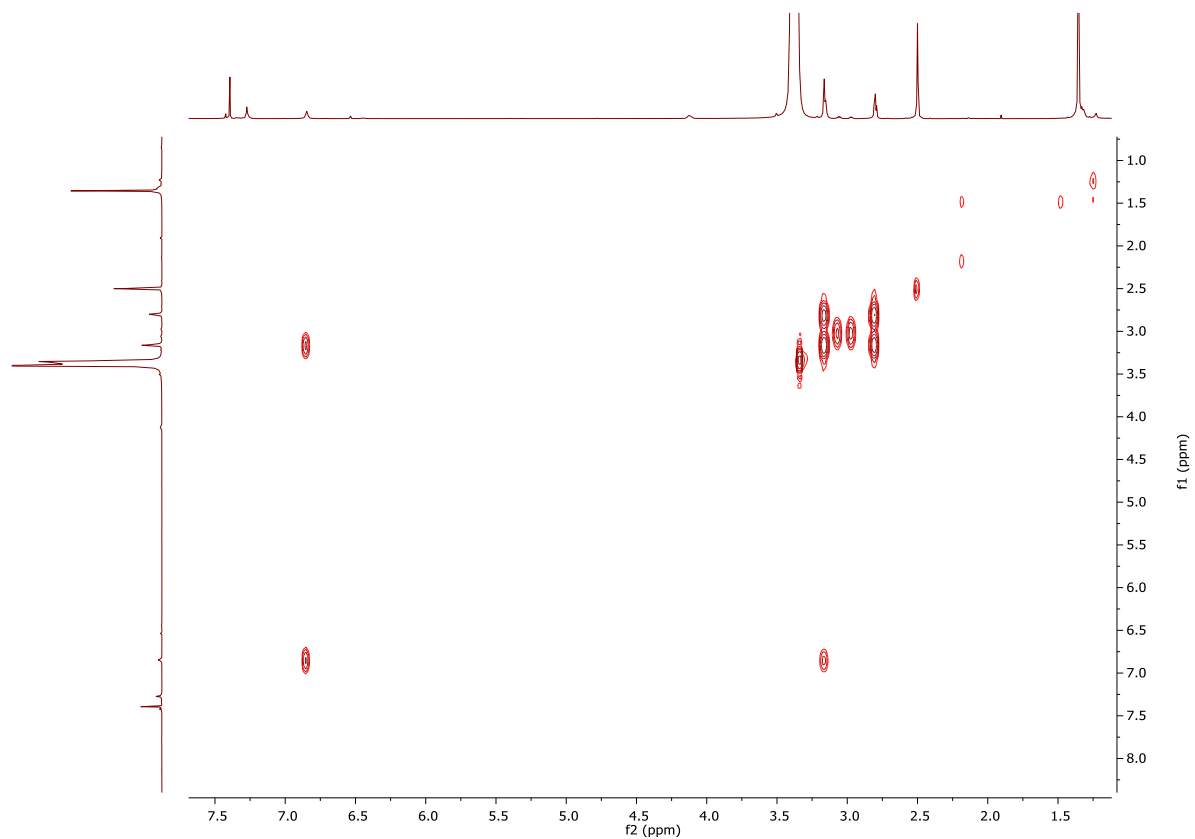

S4: HSQC NMR Spectrum for Compound **3** in DMSO-*d*<sub>6</sub>

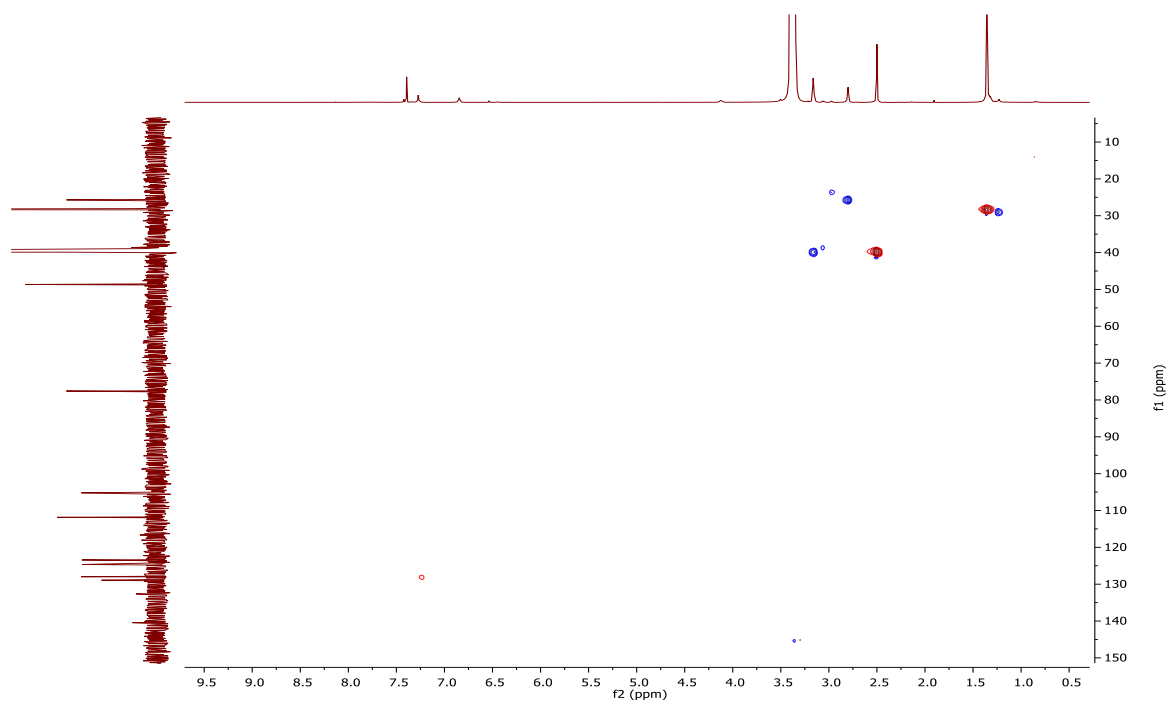

S5: HMBC NMR Spectrum for Compound 3 in DMSO-*d*<sub>6</sub>

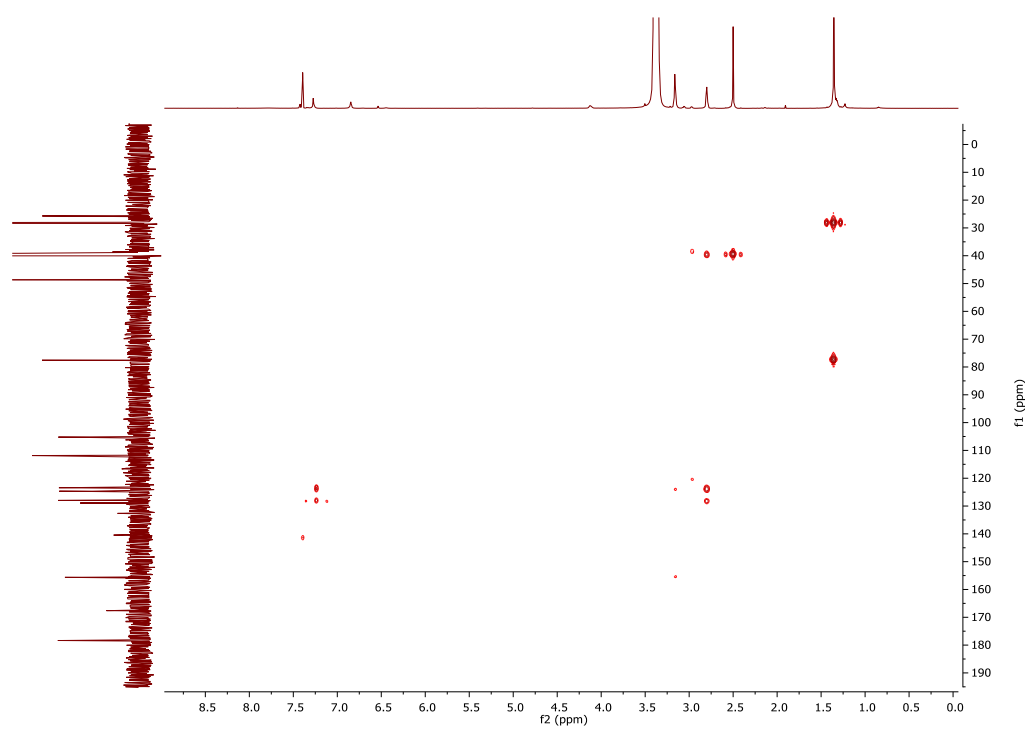

**S6:**  $^1\text{H}$  NMR Spectrum for Compound **4** in  $\text{DMSO}-d_6$

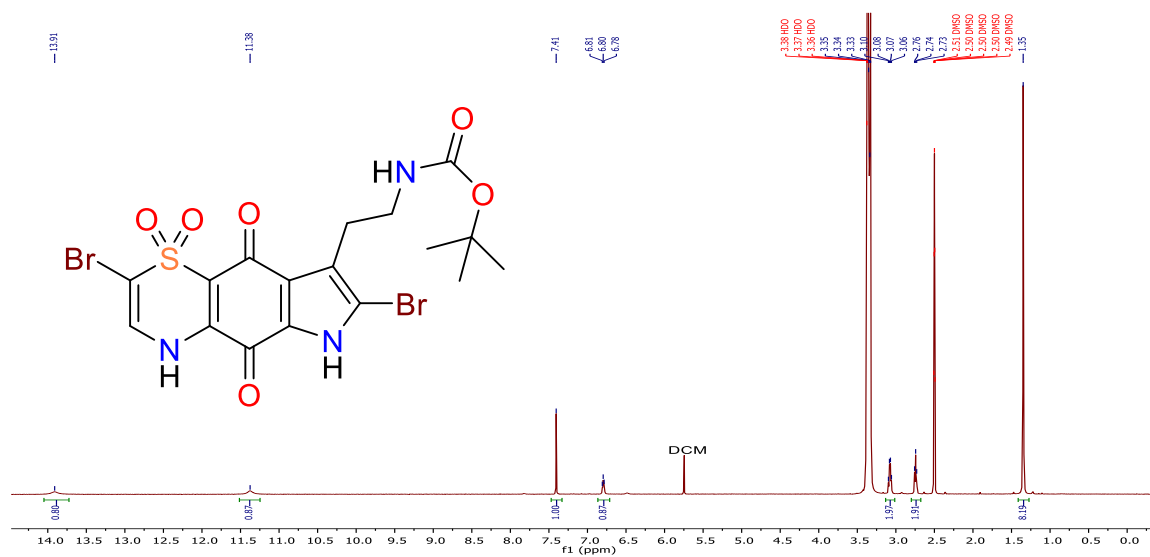

**S7:**  $^{13}\text{C}$  NMR Spectrum for Compound **4** in  $\text{DMSO}-d_6$

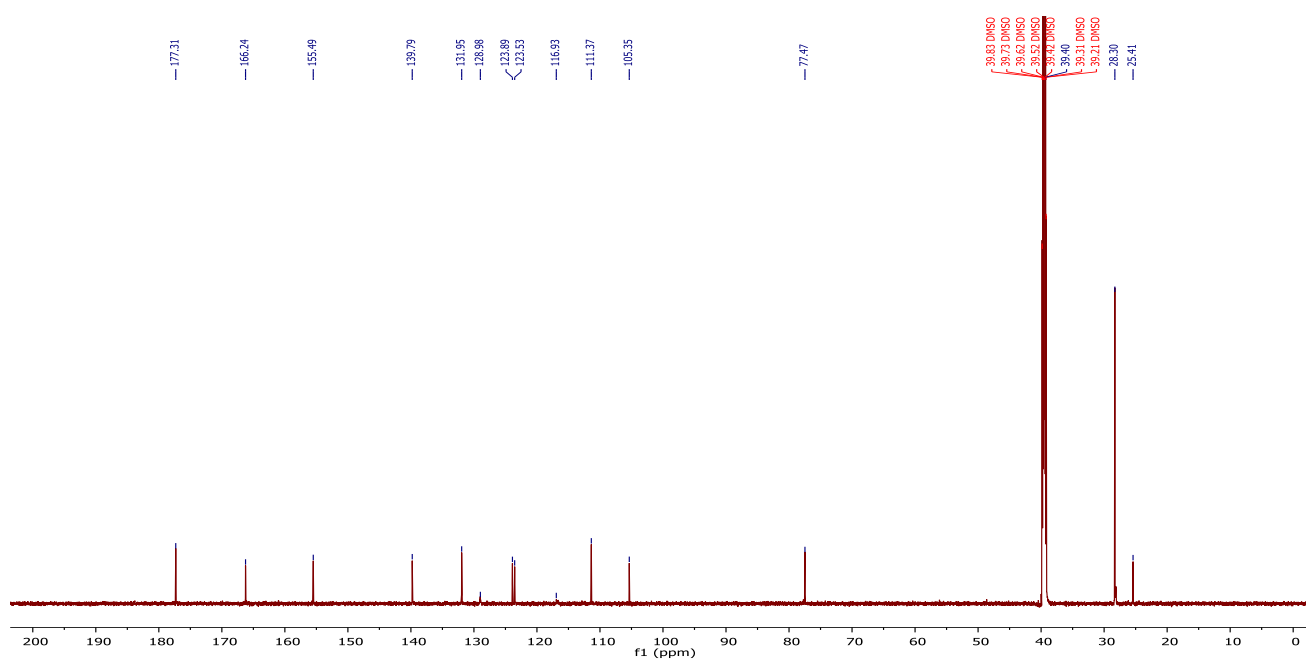

S8: COSY NMR Spectrum for Compound **4** in DMSO- $d_6$

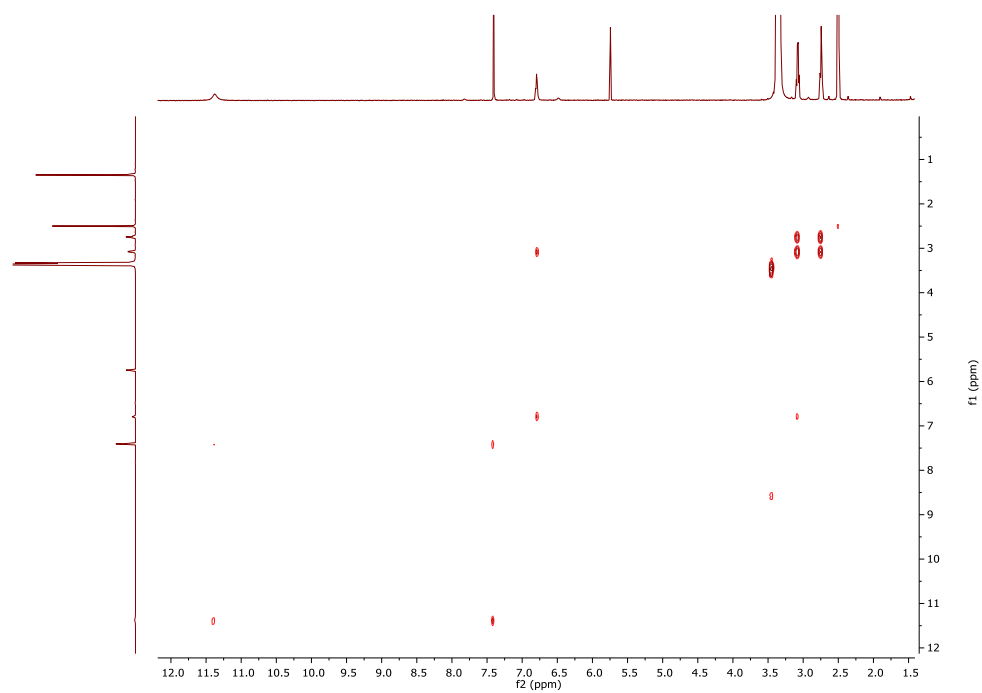

S9: HSQC NMR Spectrum for Compound **4** in DMSO- $d_6$

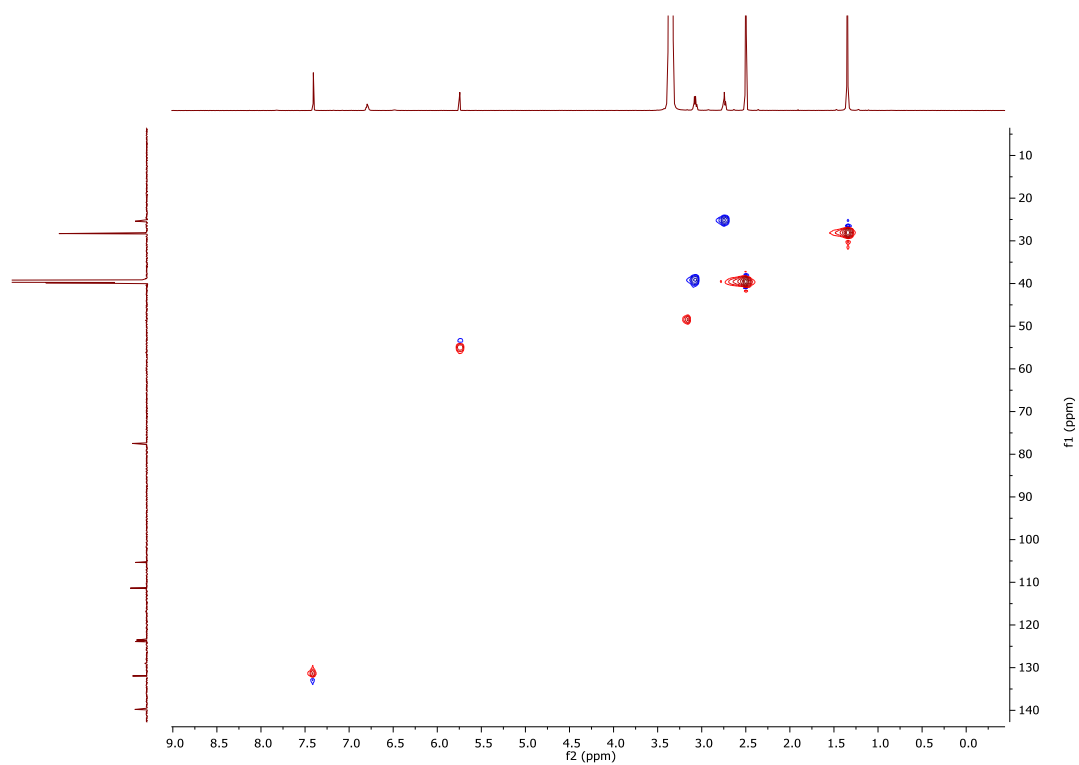



**S10:** HMBC NMR Spectrum for Compound **4** in DMSO- $d_6$

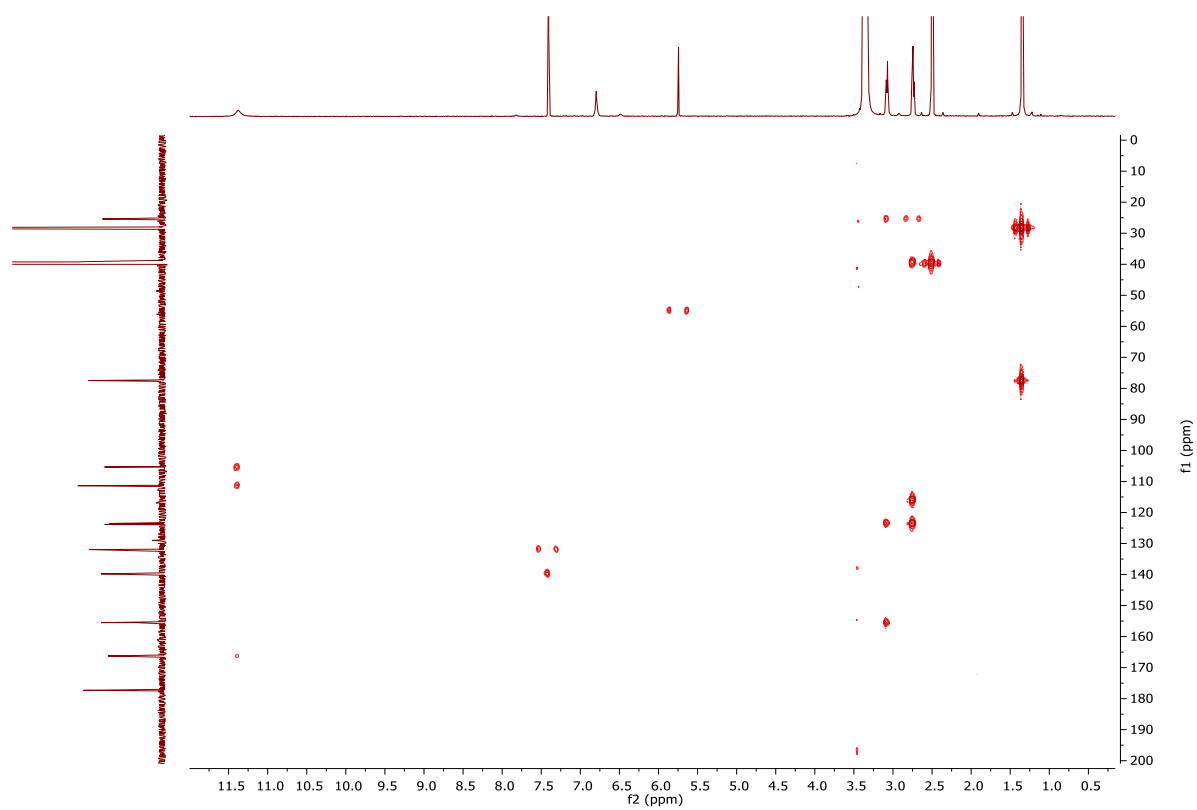

**S11:**  $^1\text{H}$  NMR Spectrum for Compound 5 in  $\text{DMSO}-d_6$

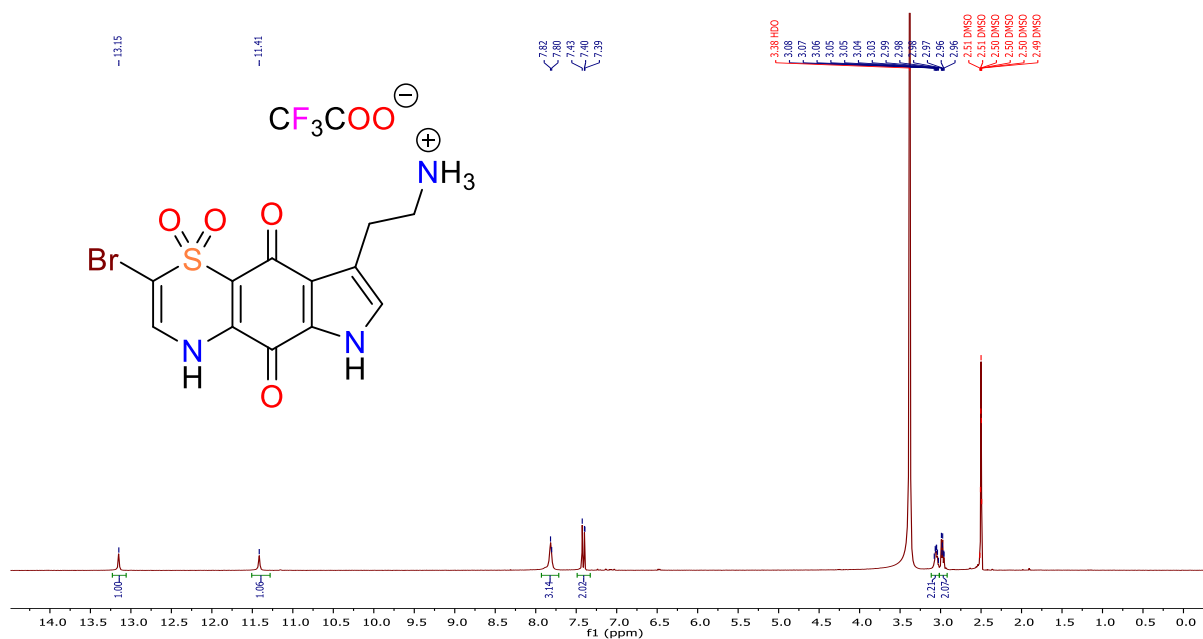

**S12:**  $^{13}\text{C}$  NMR Spectrum for Compound 5 in  $\text{DMSO}-d_6$

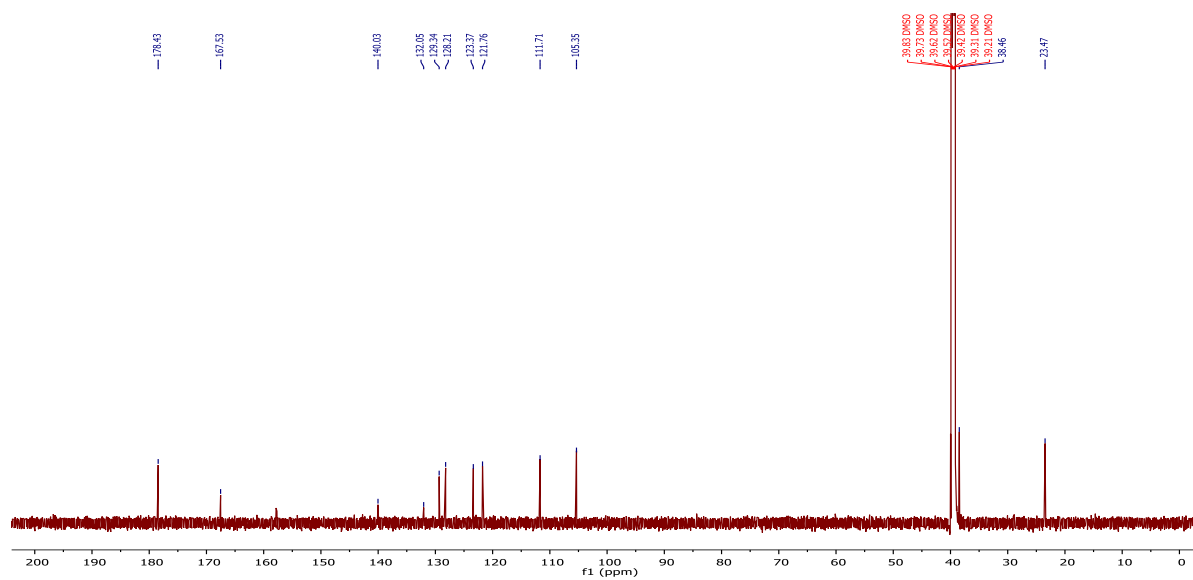

S13: COSY NMR Spectrum for Compound 5 in DMSO- $d_6$

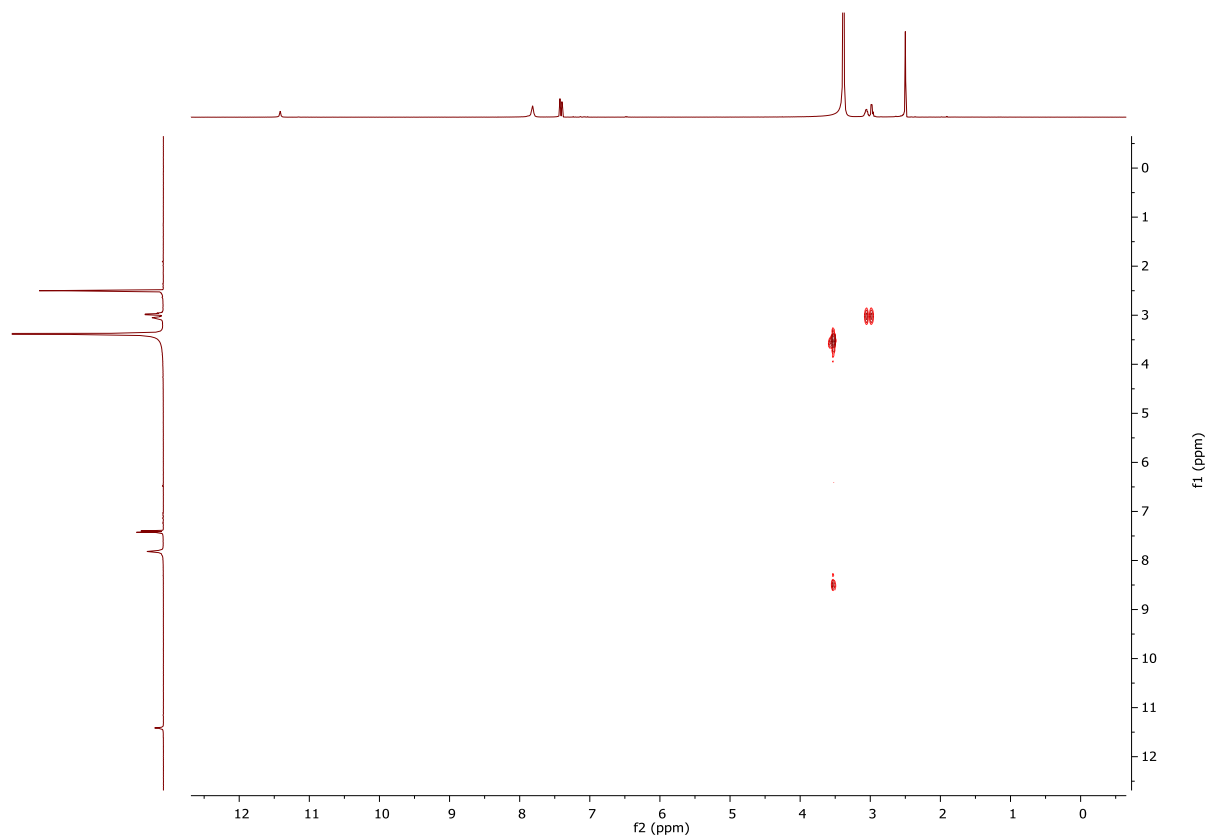

S14: HSQC NMR Spectrum for Compound 5 in DMSO- $d_6$

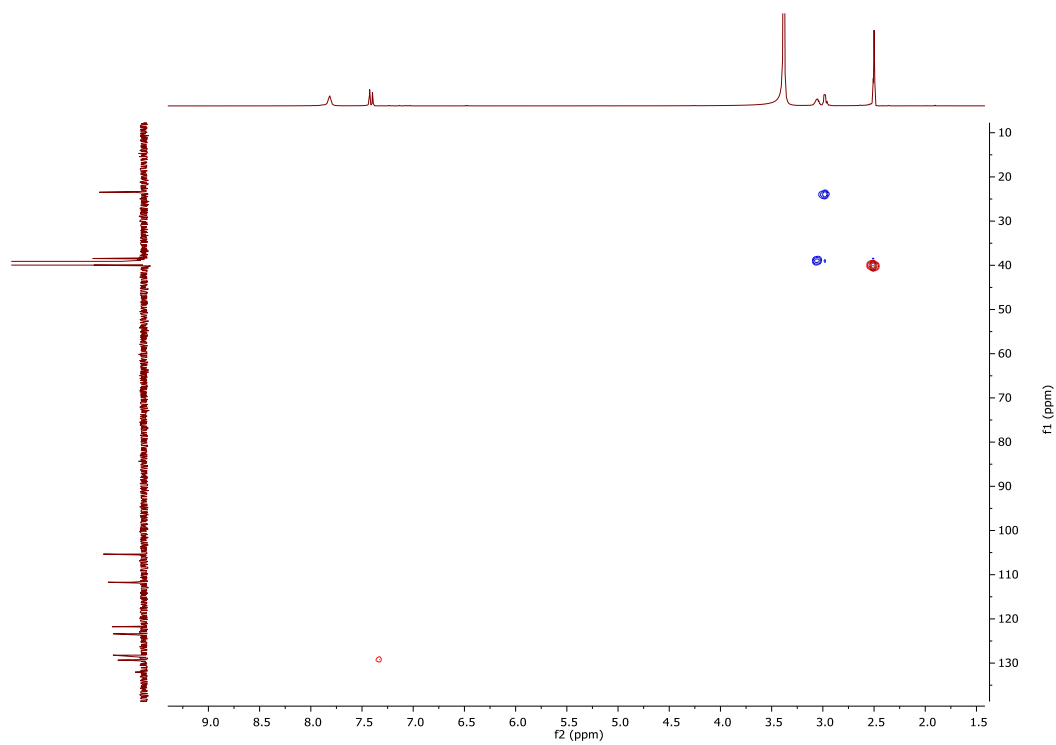

S15: HMBC NMR Spectrum for Compound 5 in DMSO- $d_6$

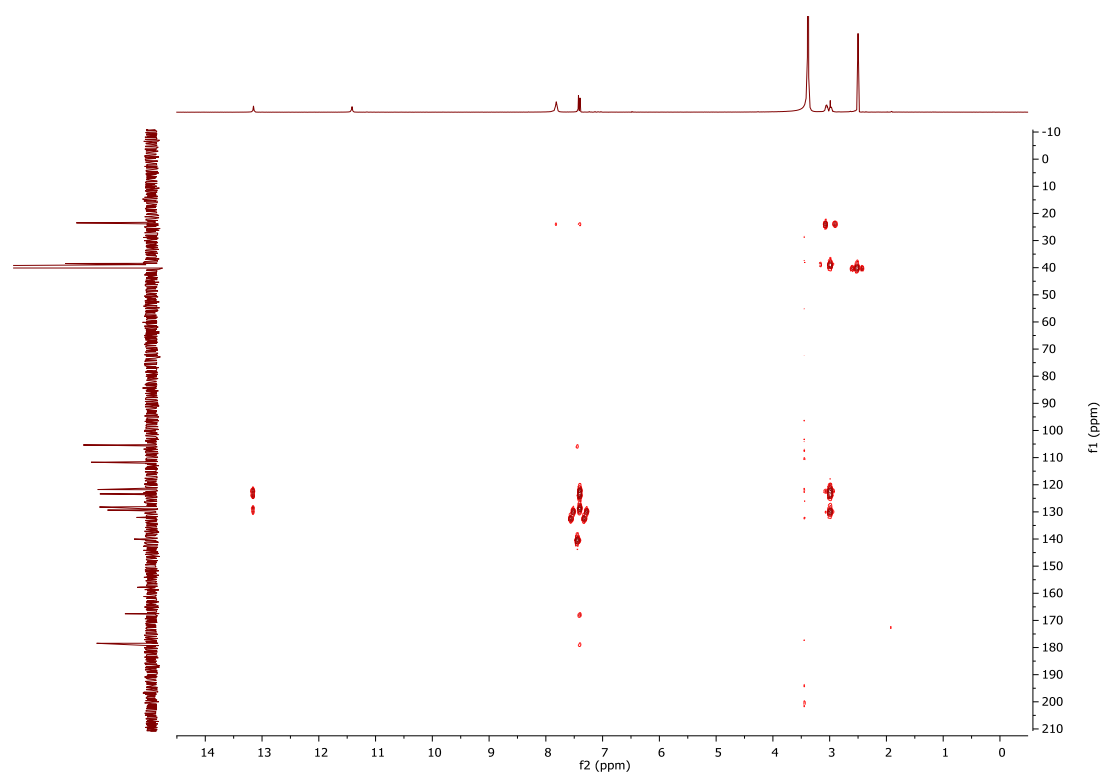

S16:  $^1\text{H}$  NMR Spectrum for Compound **6** in  $\text{DMSO}-d_6$

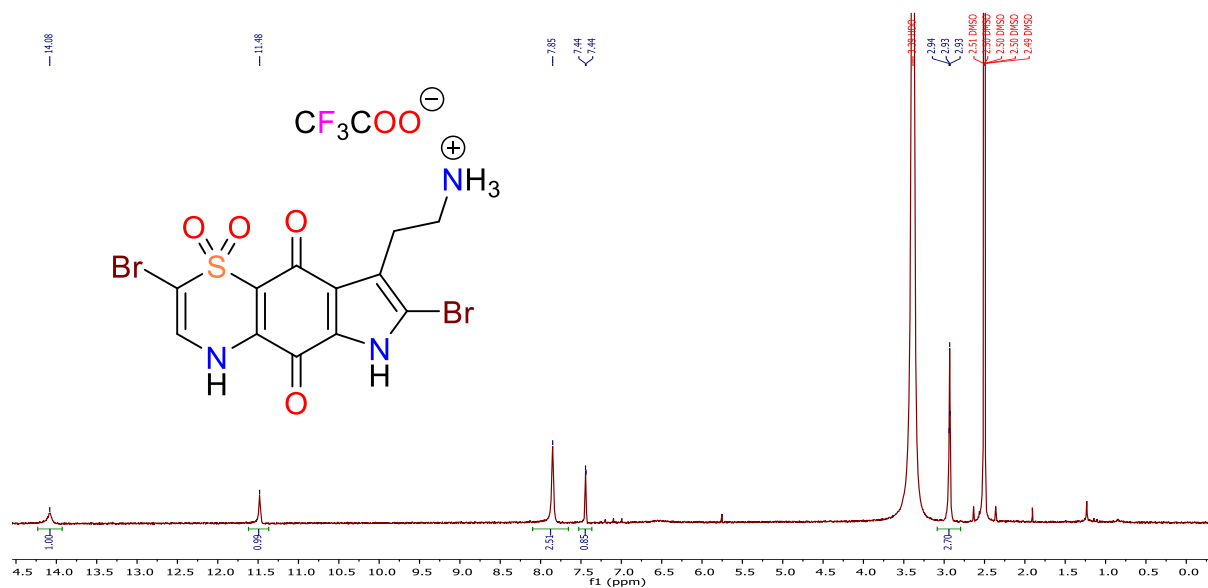

S17:  $^{13}\text{C}$  NMR Spectrum for Compound **6** in  $\text{DMSO}-d_6$

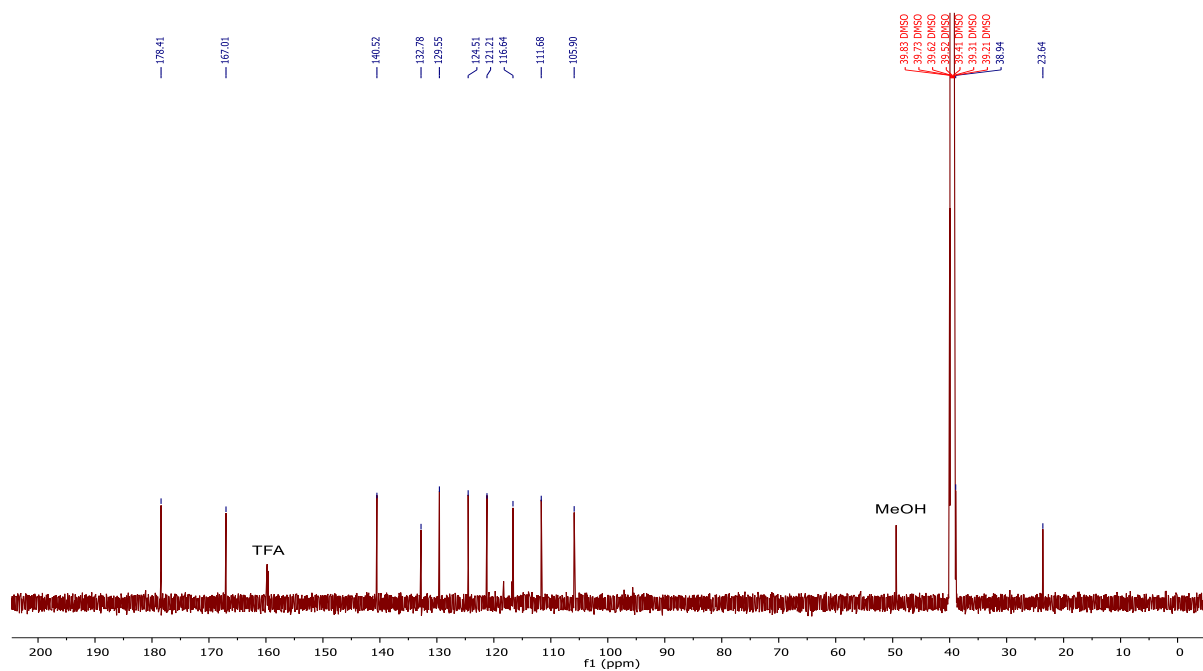

**S18:** COSY NMR Spectrum for Compound **6** in DMSO-*d*<sub>6</sub>

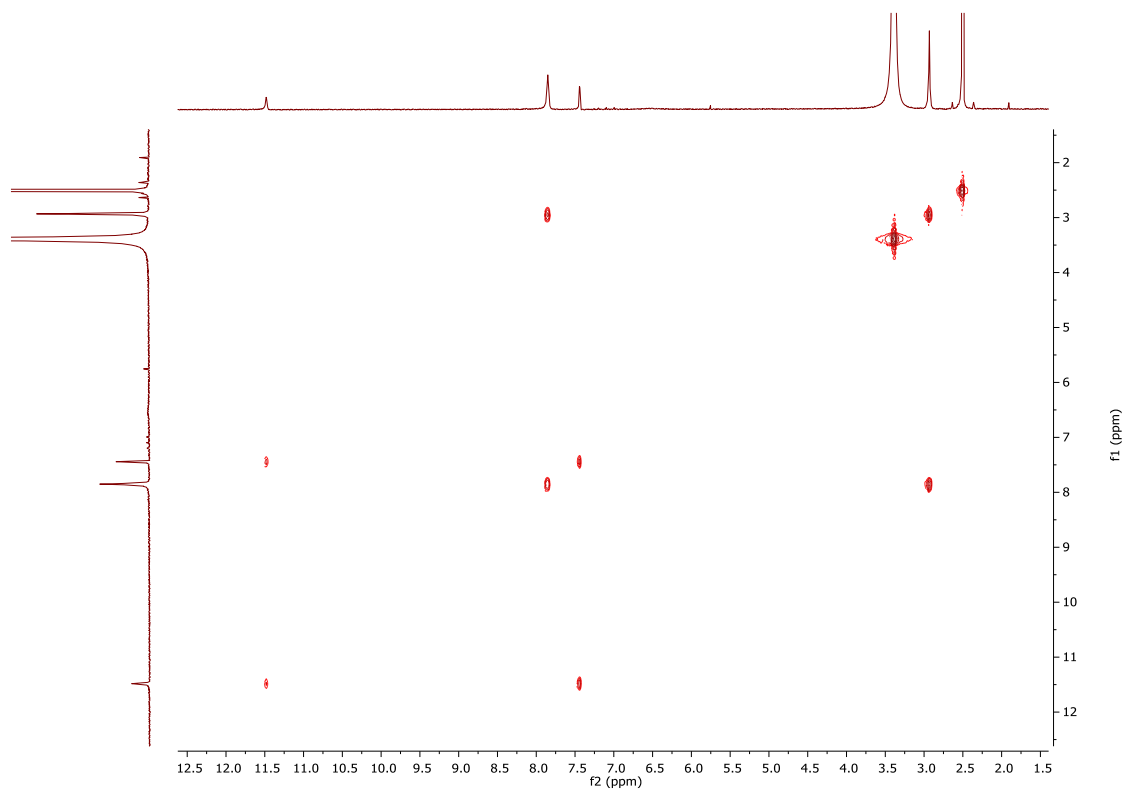

**S19:** HSQC NMR Spectrum for Compound **6** in DMSO-*d*<sub>6</sub>

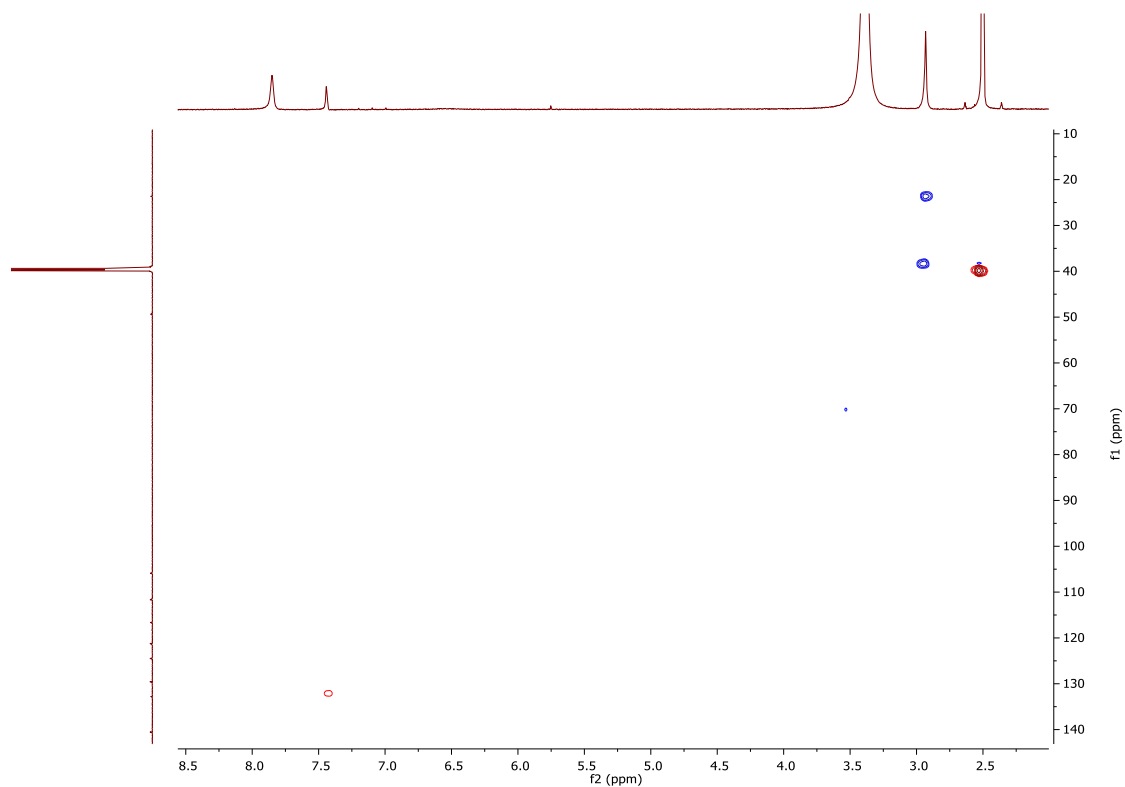

S20: HMBC NMR Spectrum for Compound **6** in DMSO-*d*<sub>6</sub>

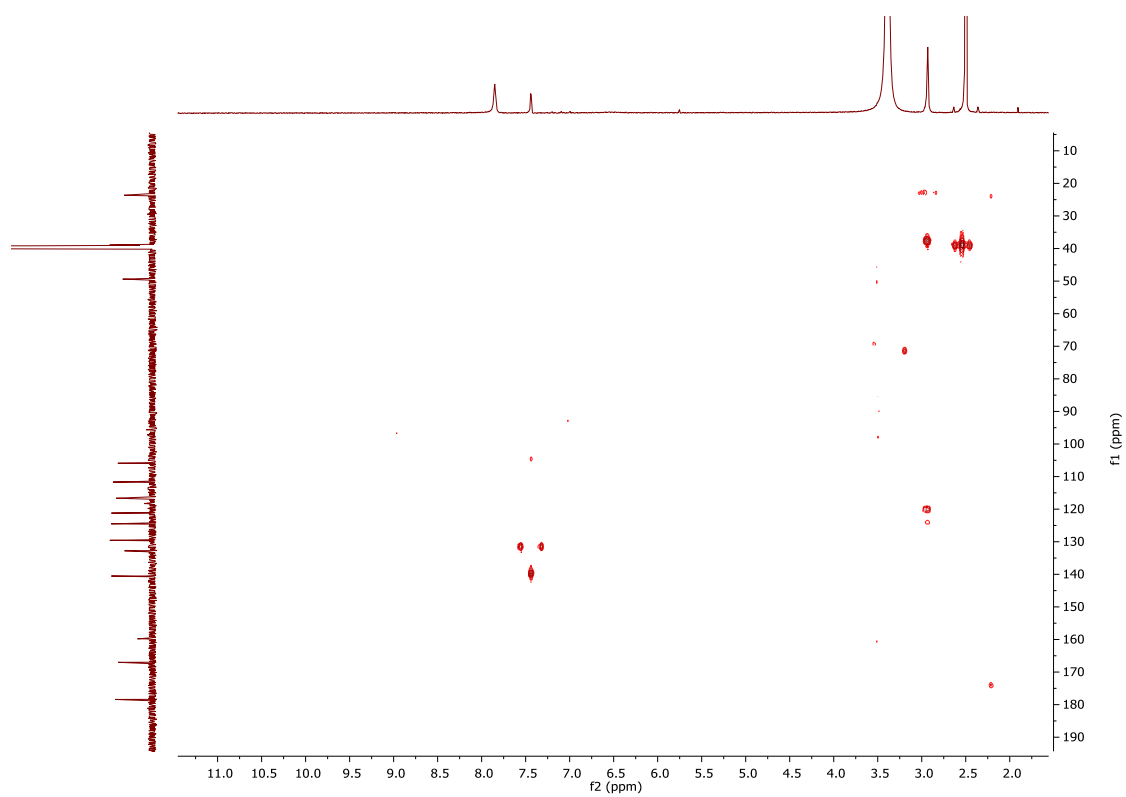

S21:  $^1\text{H}$  NMR Spectrum for Compound 7 in  $\text{DMSO}-d_6$

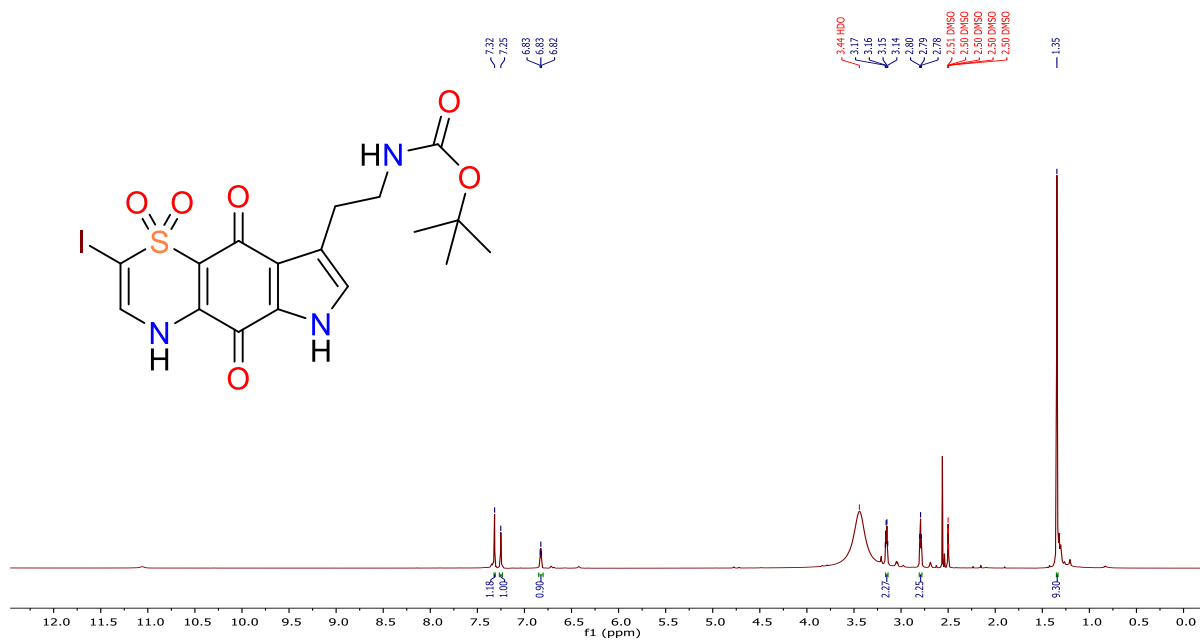

S22:  $^{13}\text{C}$  NMR Spectrum for Compound 7 in  $\text{DMSO}-d_6$

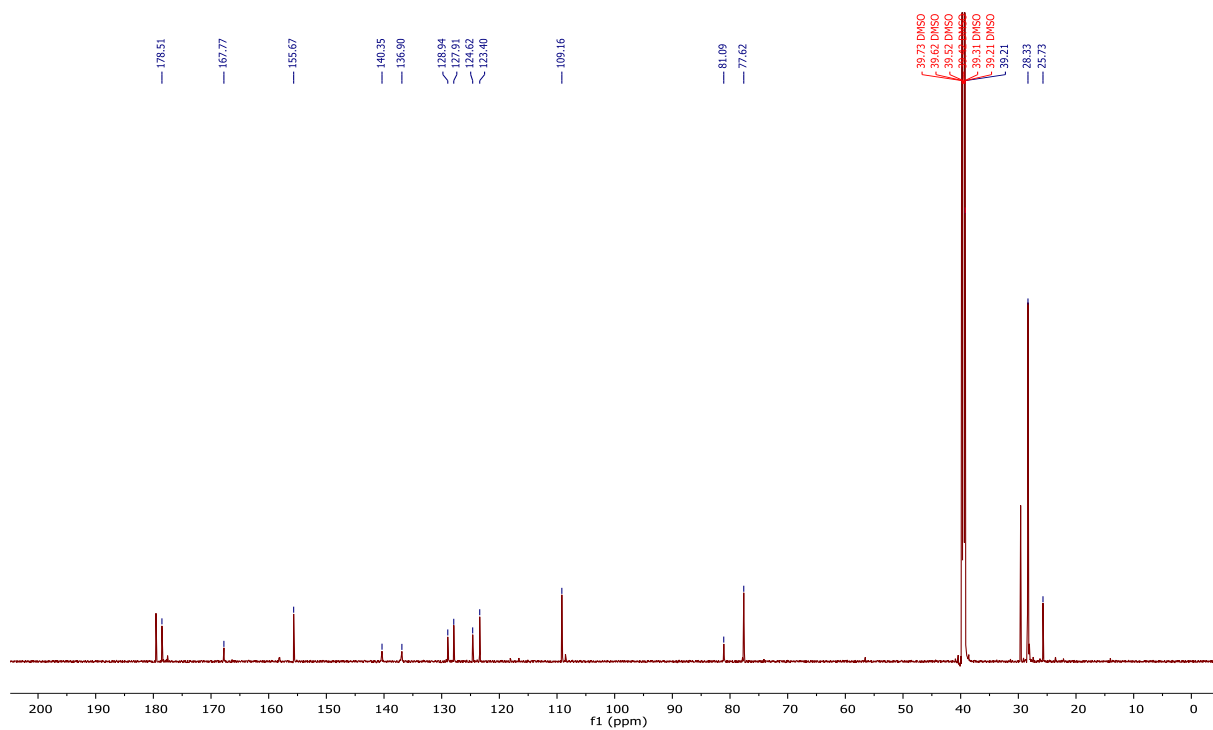



S23: COSY NMR Spectrum for Compound 7 in DMSO- $d_6$

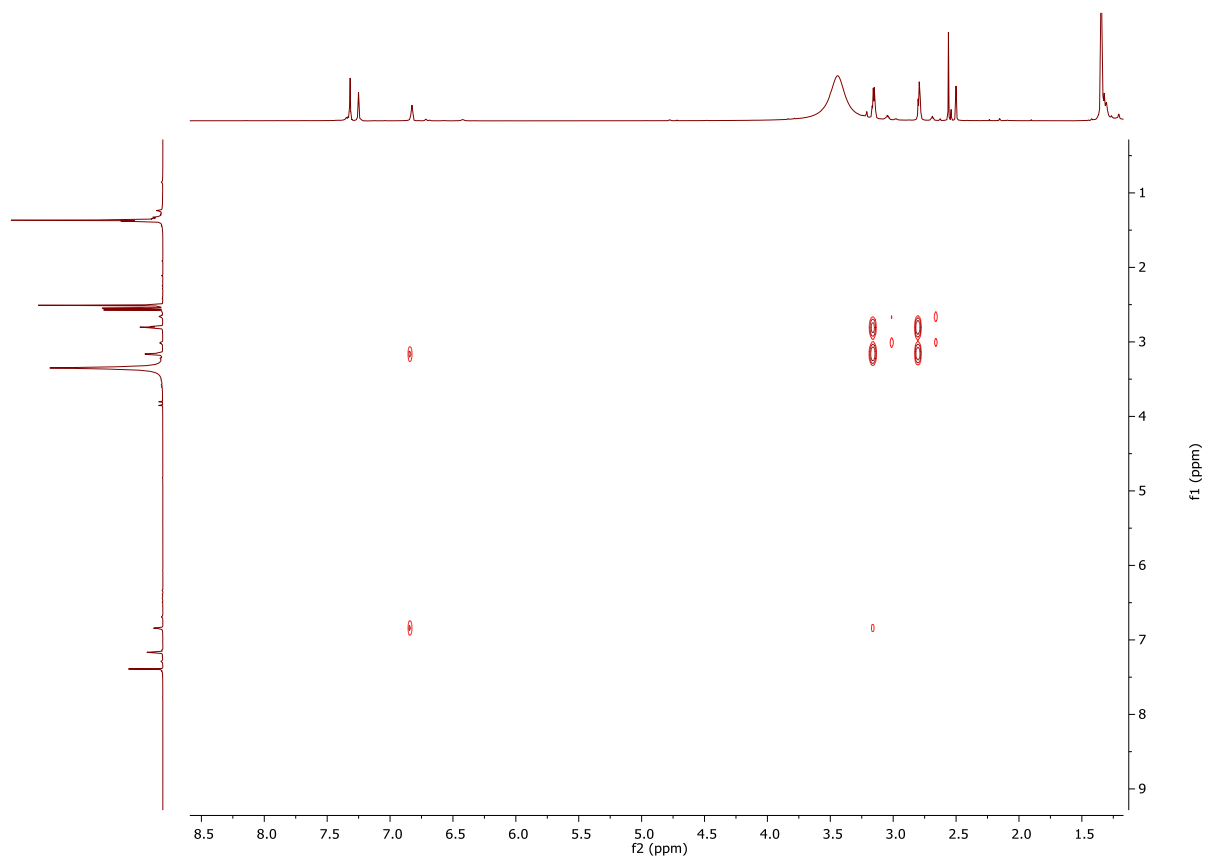

S24: HSQC NMR Spectrum for Compound 7 in DMSO- $d_6$

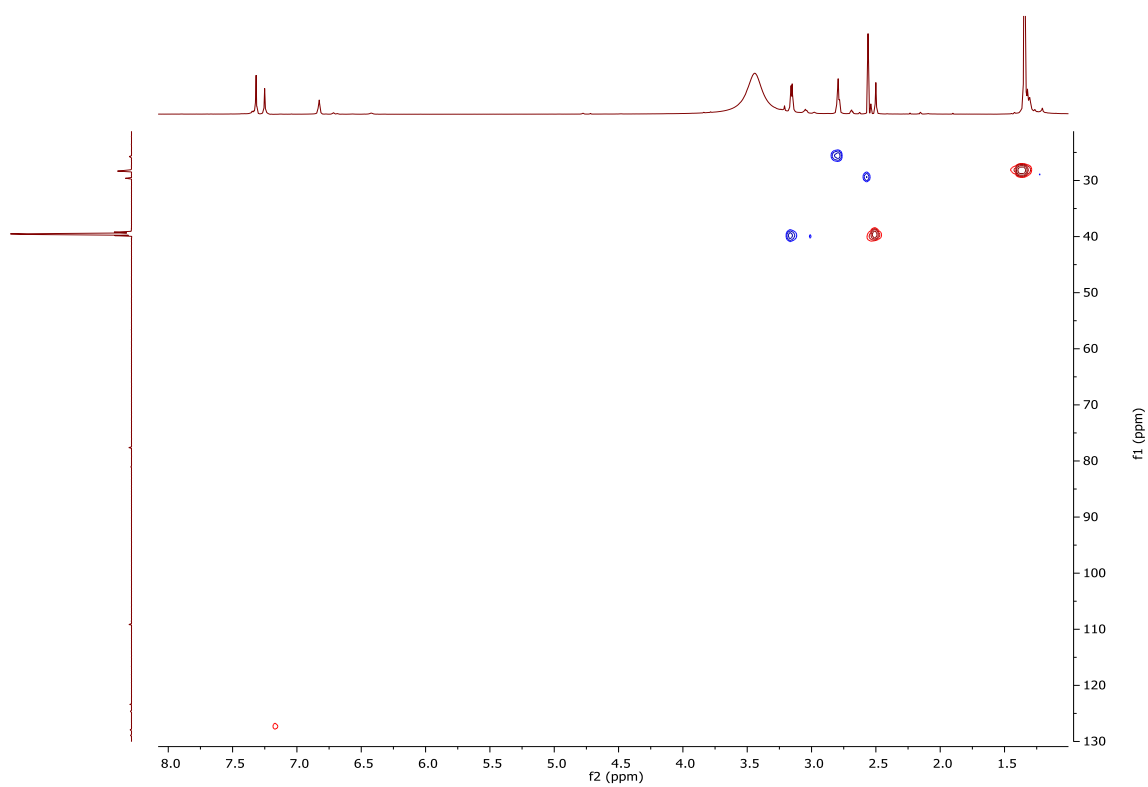

S25: HMBC NMR Spectrum for Compound 7 in DMSO- $d_6$

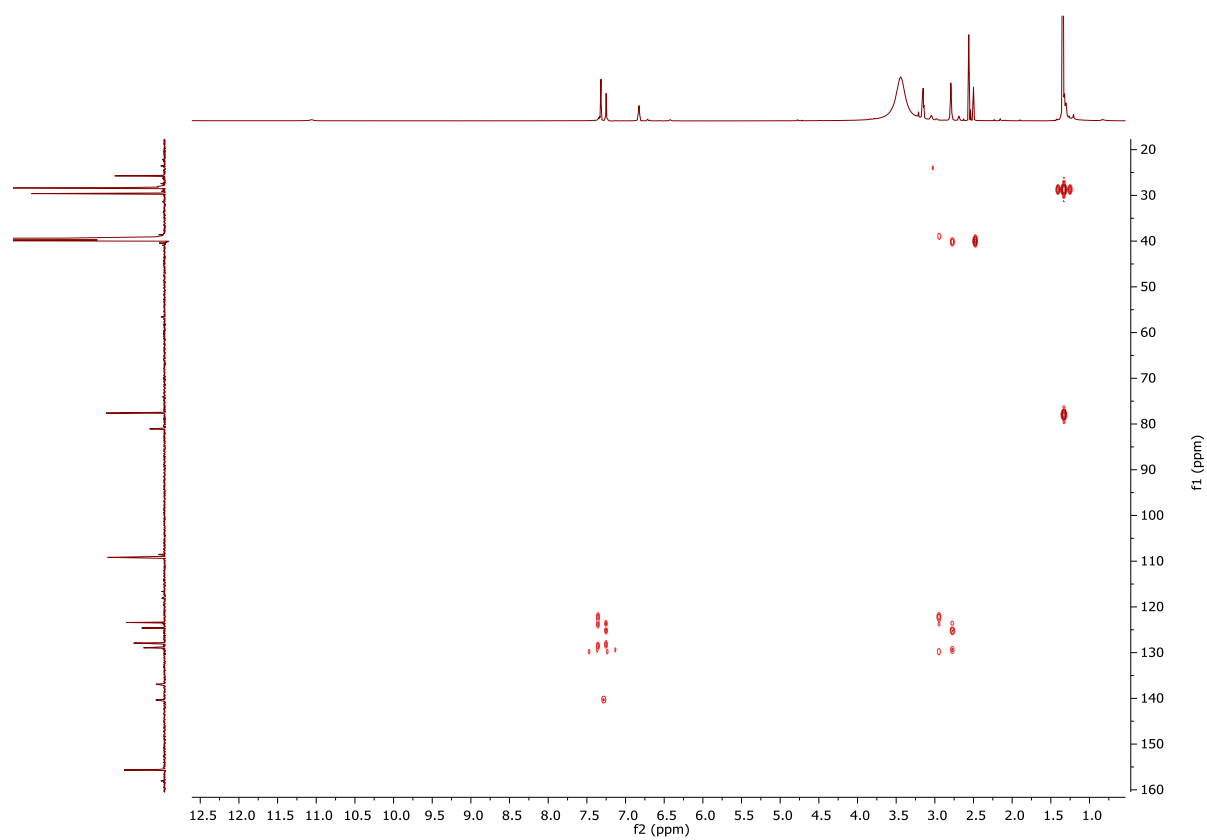

S26:  $^1\text{H}$  NMR Spectrum for Compound **8** in  $\text{DMSO}-d_6$

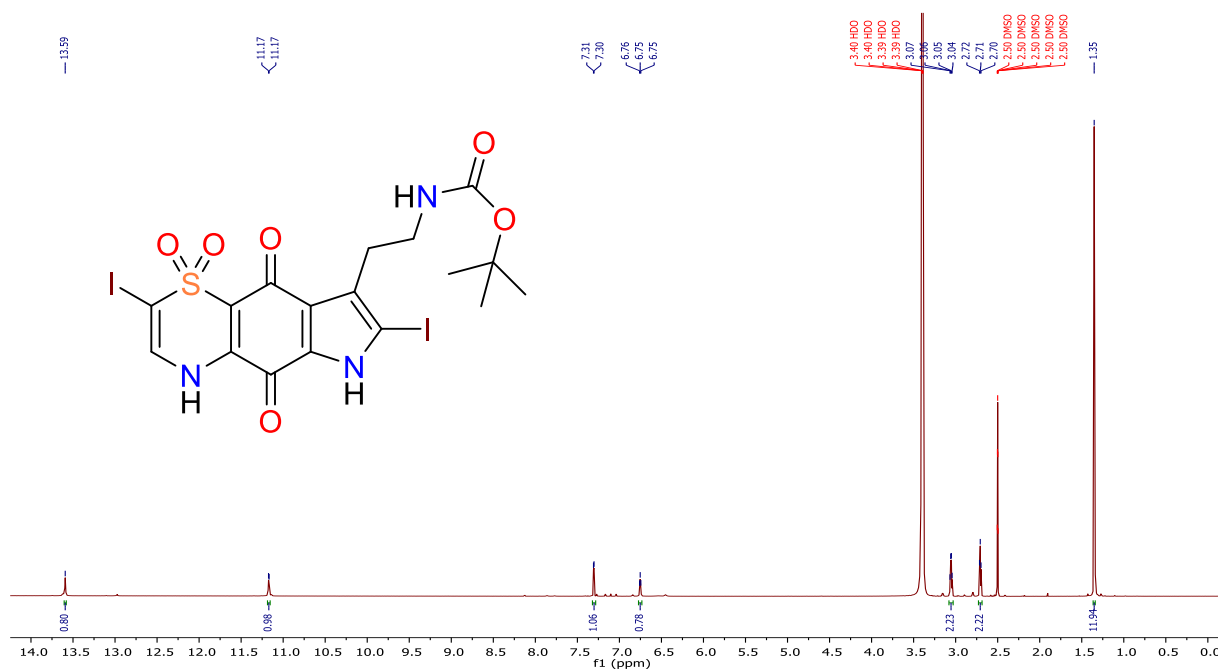

S27:  $^{13}\text{C}$  NMR Spectrum for Compound **8** in  $\text{DMSO}-d_6$

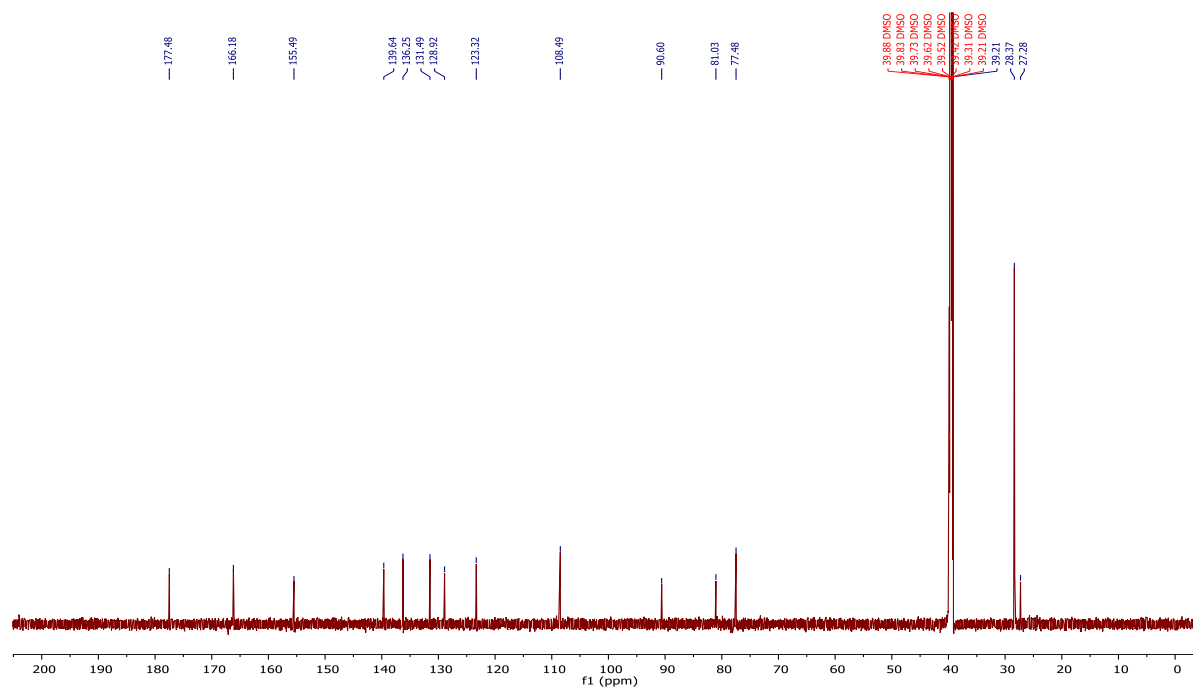

S28: COSY NMR Spectrum for Compound 8 in DMSO- $d_6$

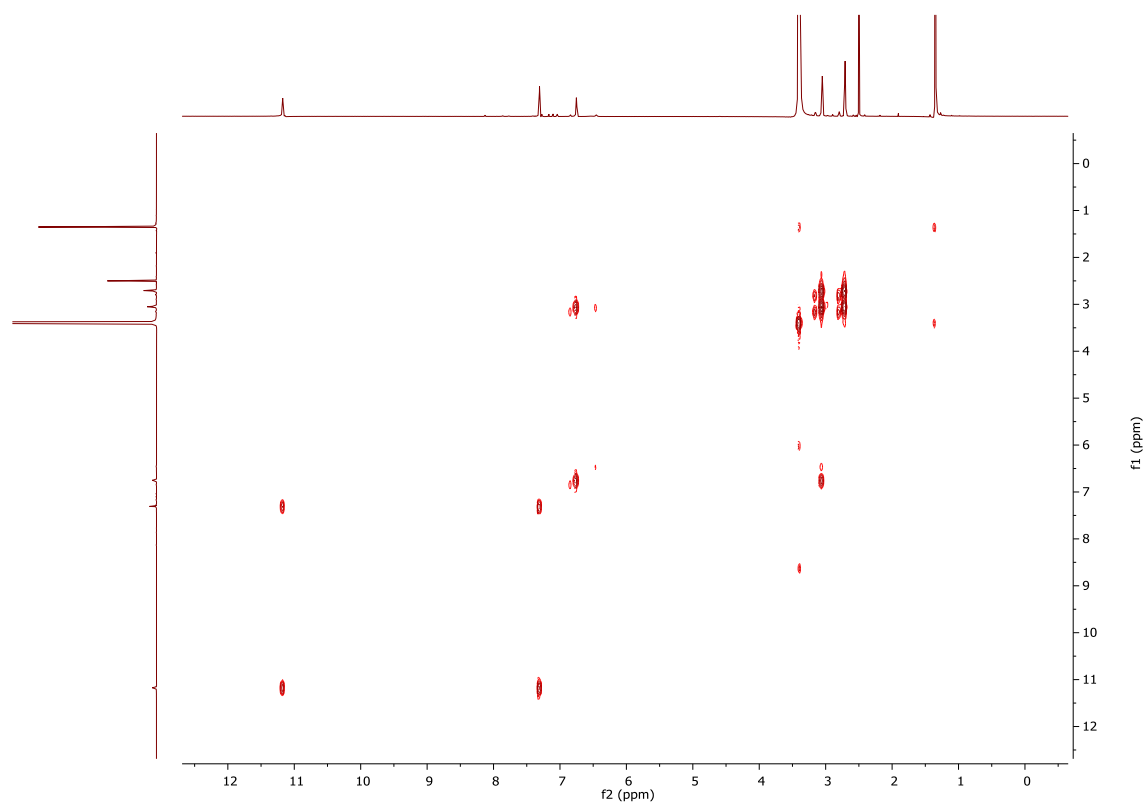

S29: HSQC NMR Spectrum for Compound 8 in DMSO- $d_6$

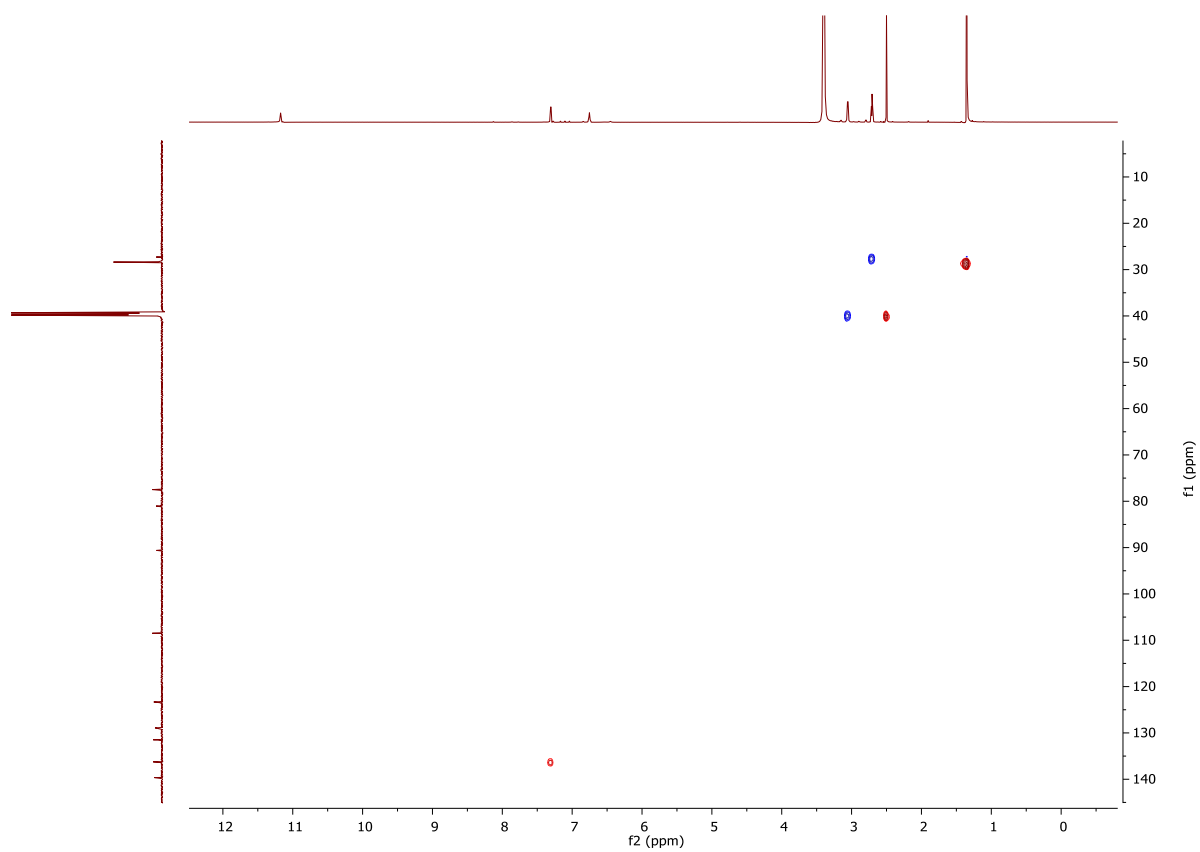

S30: HMBC NMR Spectrum for Compound 8 in DMSO-*d*<sub>6</sub>

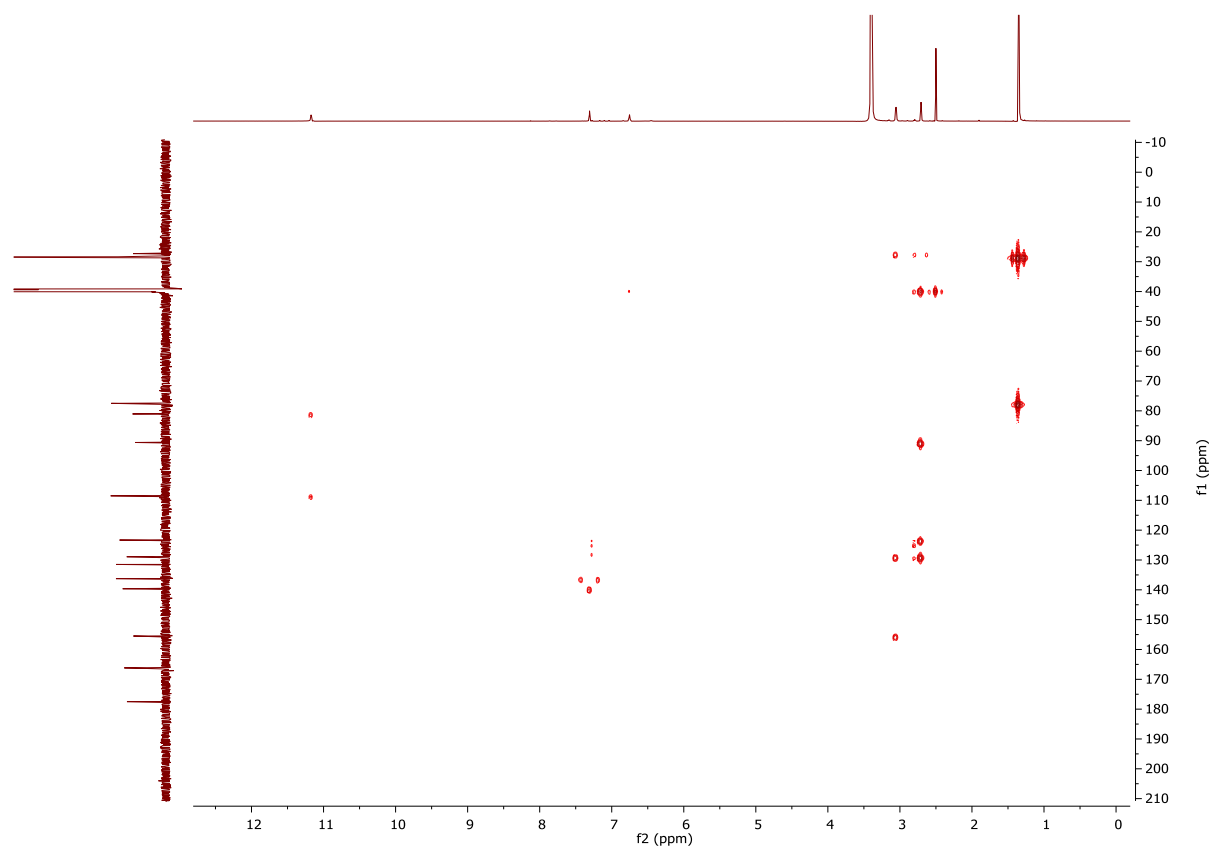

S31:  $^1\text{H}$  NMR Spectrum for Compound **9** in  $\text{DMSO-}d_6$

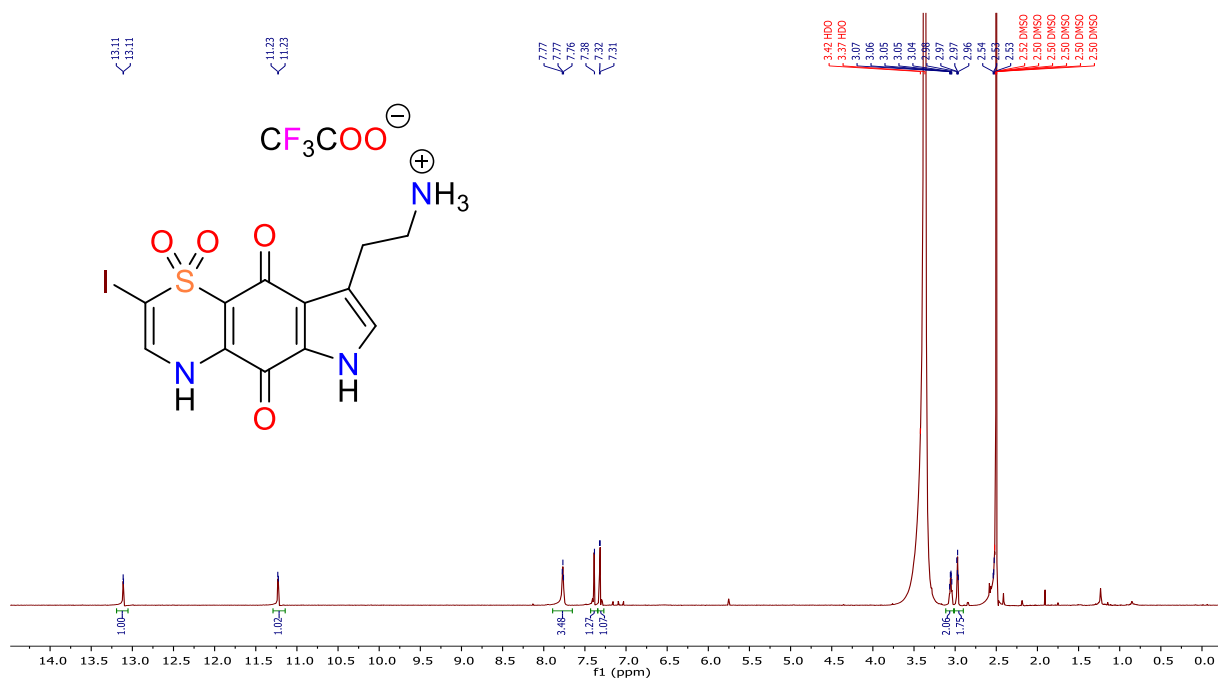

S32:  $^{13}\text{C}$  NMR Spectrum for Compound **9** in  $\text{DMSO-}d_6$

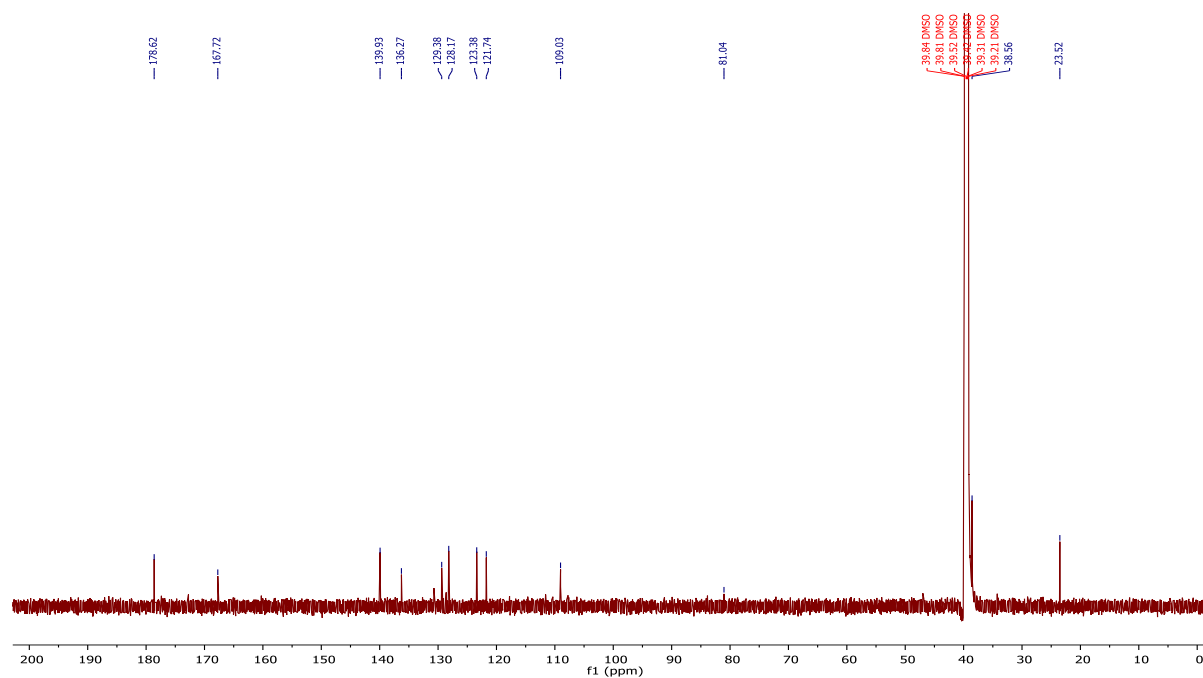

S33: COSY NMR Spectrum for Compound **9** in DMSO-*d*<sub>6</sub>

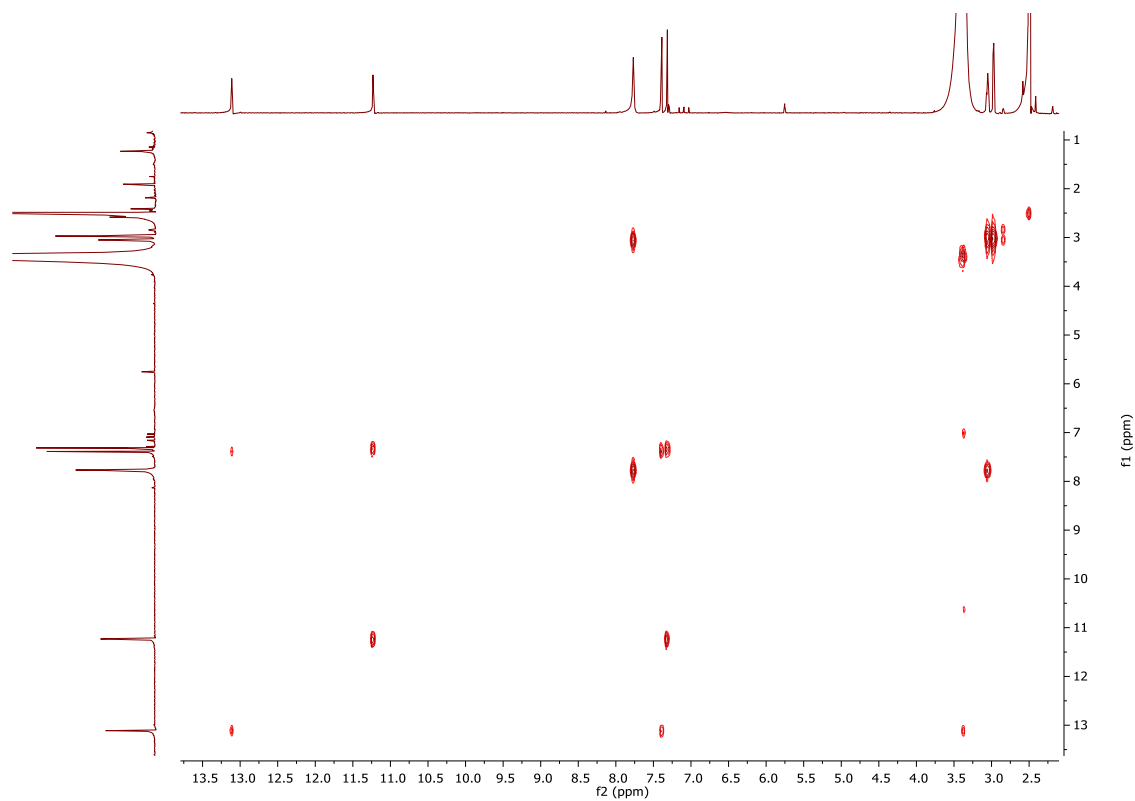

S34: HSQC NMR Spectrum for Compound **9** in DMSO-*d*<sub>6</sub>

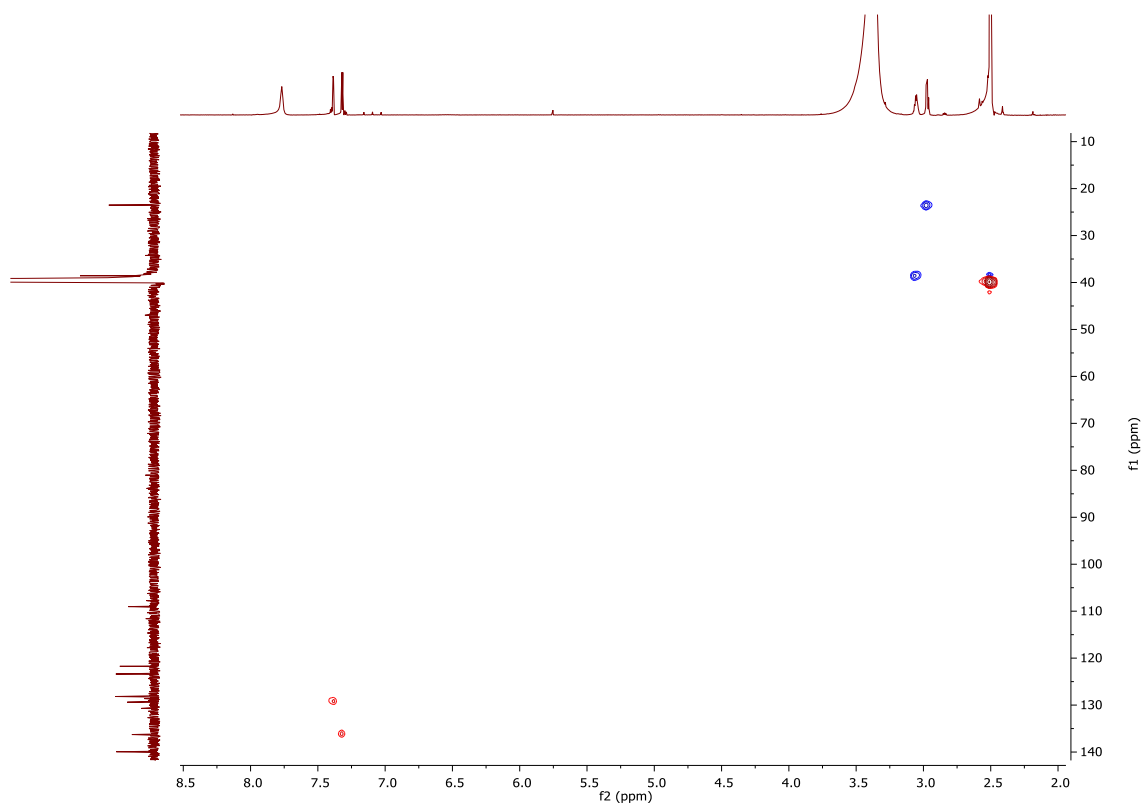

S35: HMBC NMR Spectrum for Compound 9 in DMSO- $d_6$

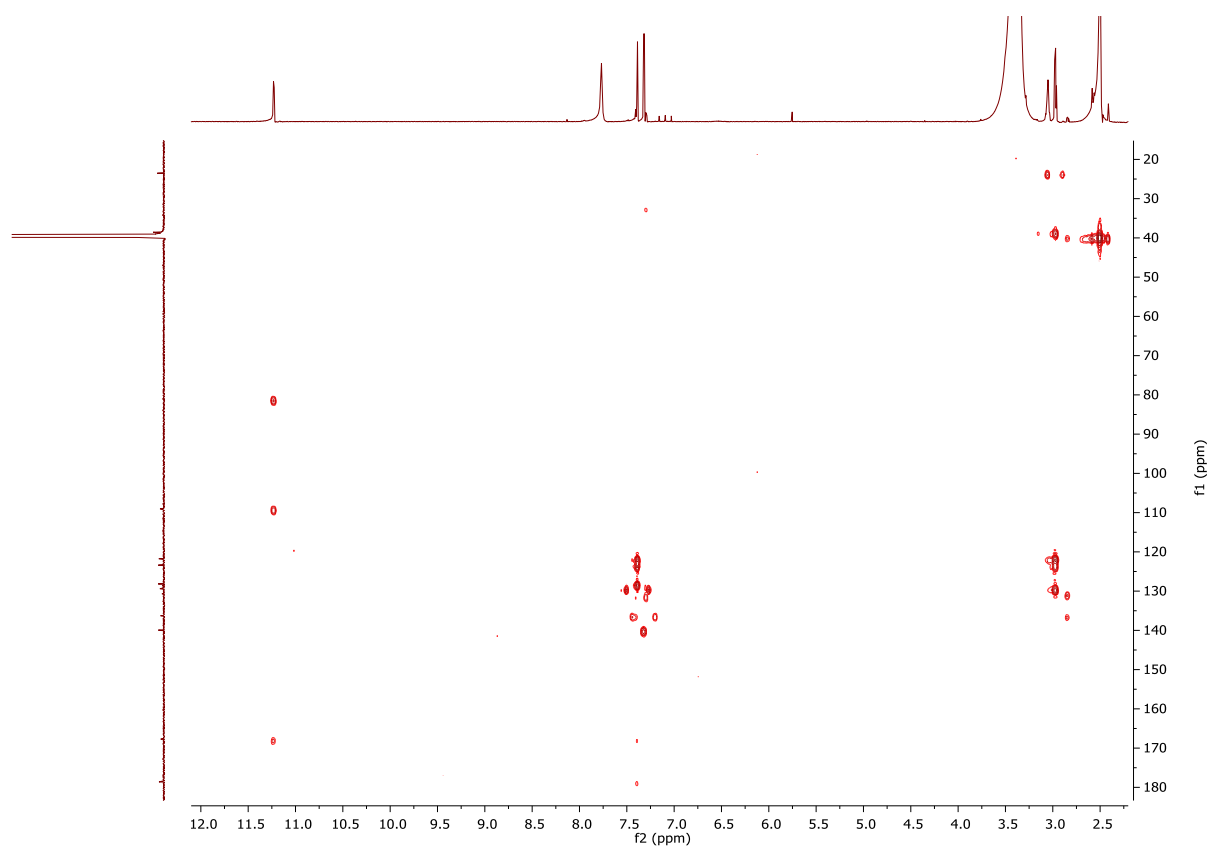



S36:  $^1\text{H}$  NMR Spectrum for Compound **10** in  $\text{DMSO}-d_6$

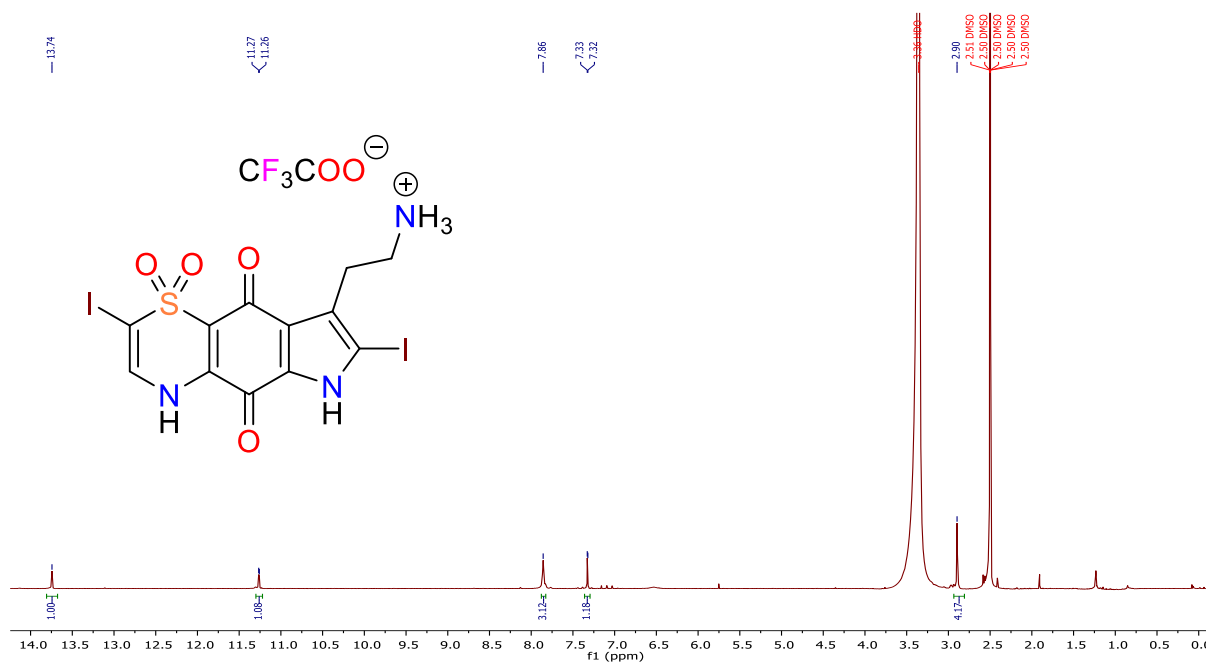

S37:  $^{13}\text{C}$  NMR Spectrum for Compound **10** in  $\text{DMSO}-d_6$

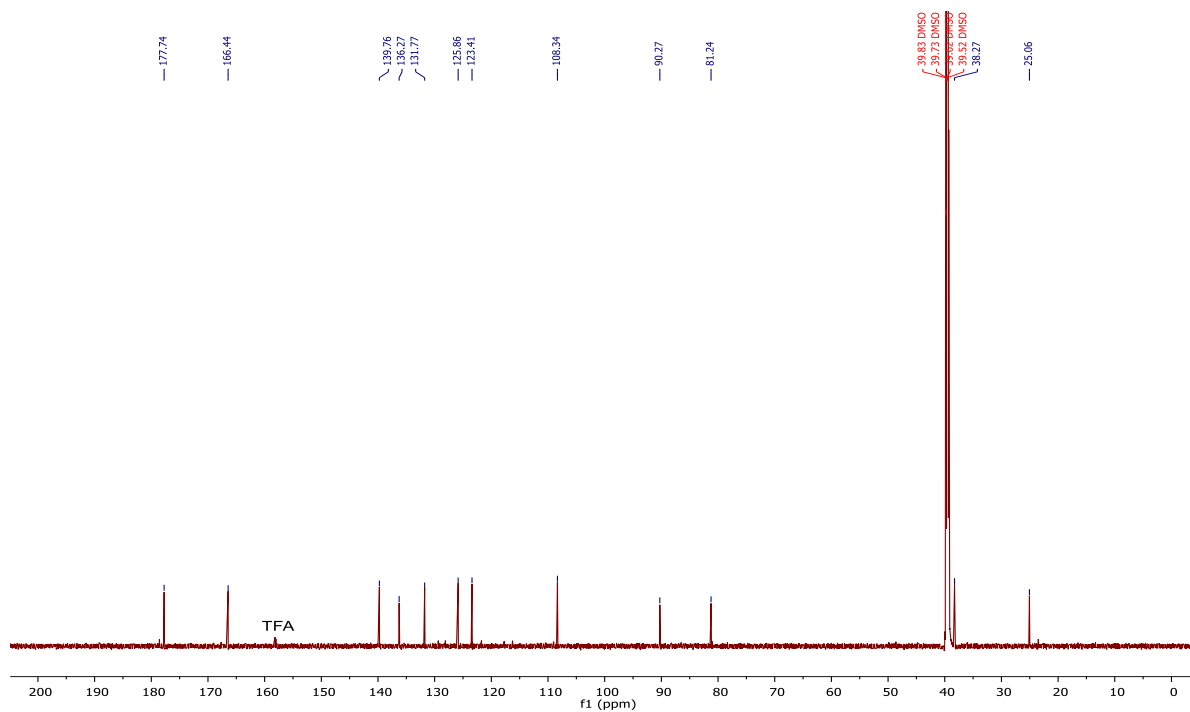

**S38:** COSY NMR Spectrum for Compound **10** in DMSO-*d*<sub>6</sub>

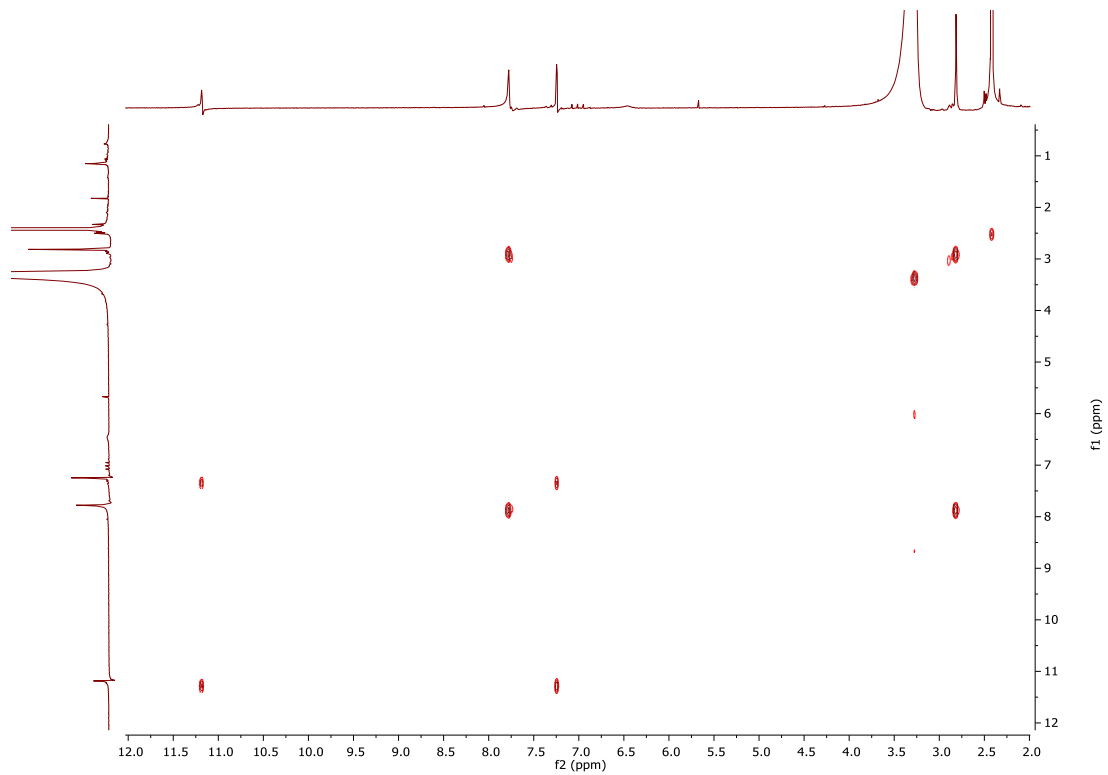

**S39:** HSQC NMR Spectrum for Compound **10** in DMSO-*d*<sub>6</sub>

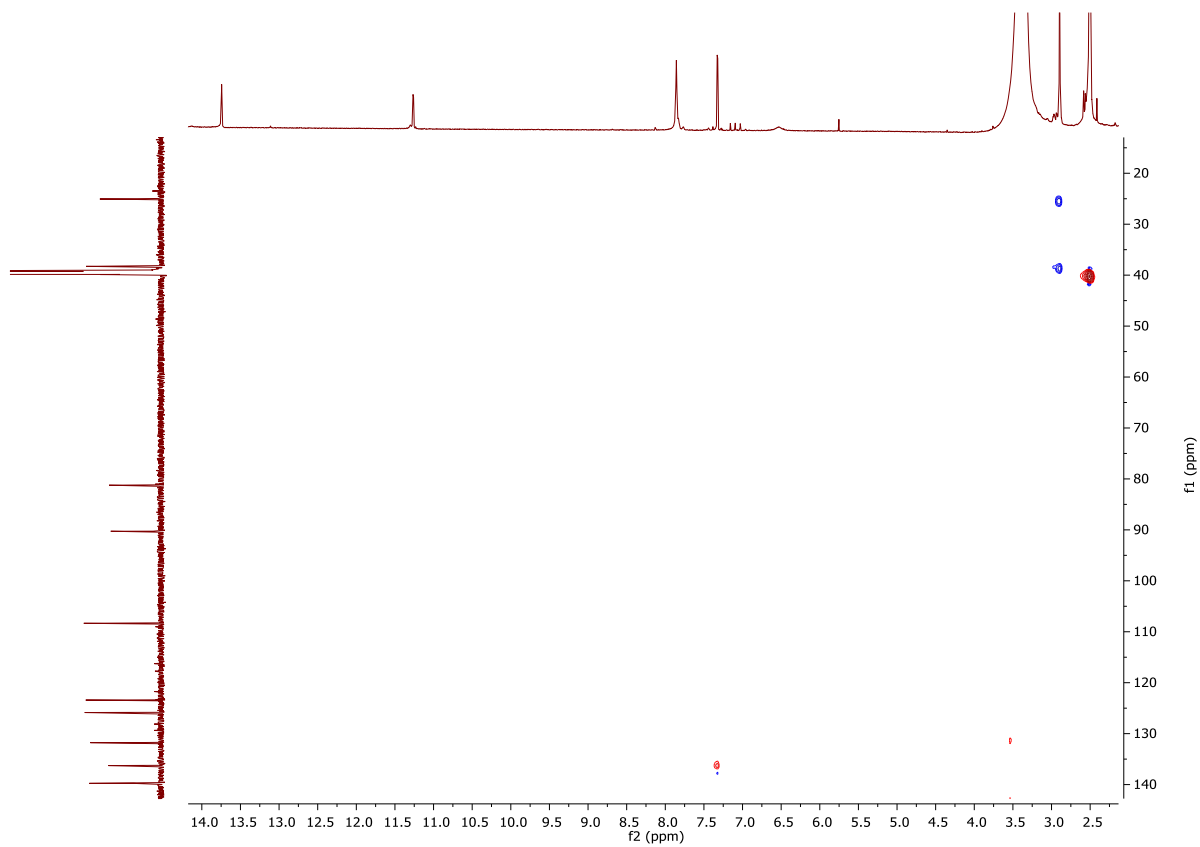

**S40:** HMBC NMR Spectrum for Compound **10** in DMSO-*d*<sub>6</sub>

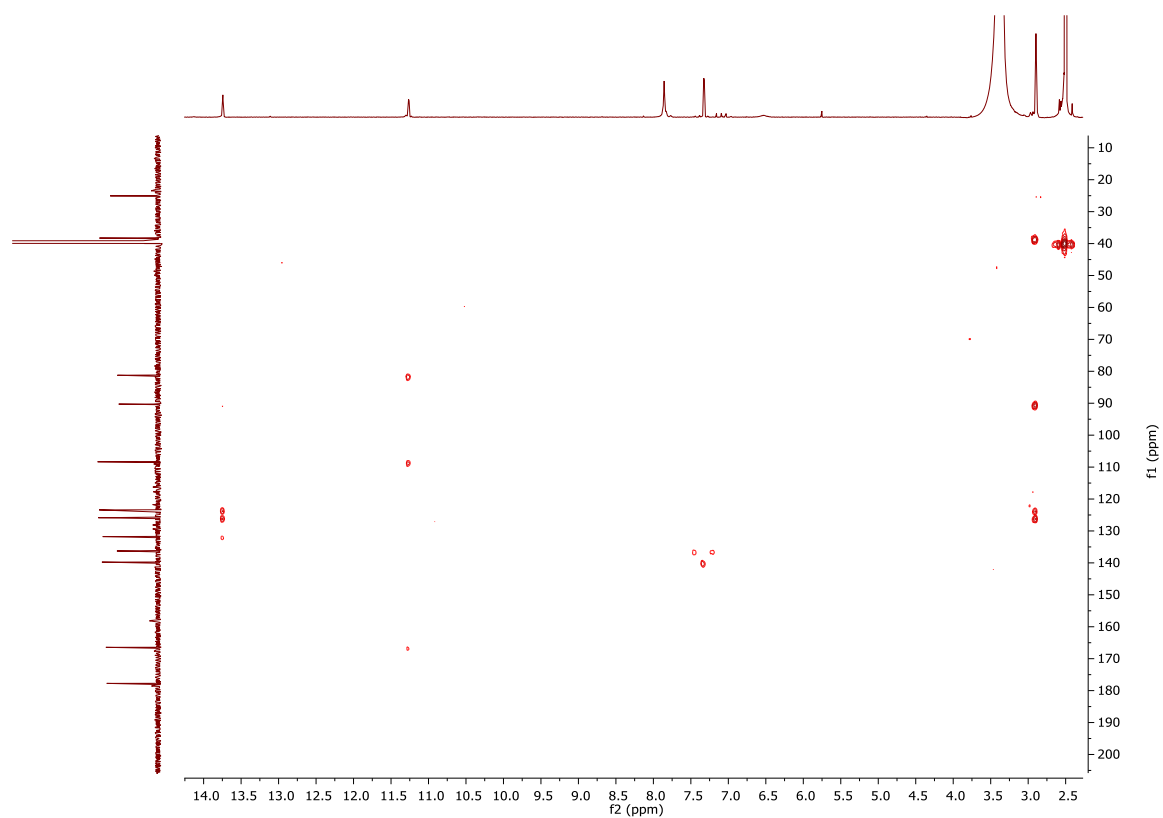

S41:  $^1\text{H}$  NMR Spectrum for Compound **11** in  $\text{DMSO}-d_6$

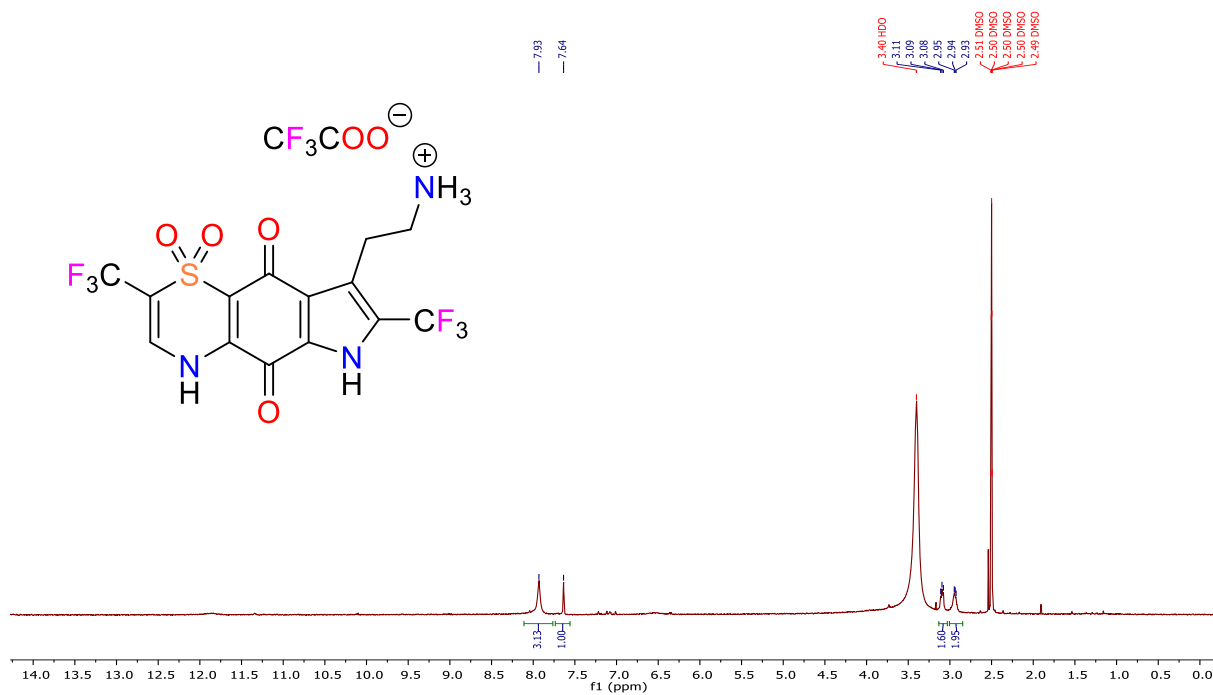

S42:  $^{13}\text{C}$  NMR Spectrum for Compound **11** in  $\text{DMSO}-d_6$

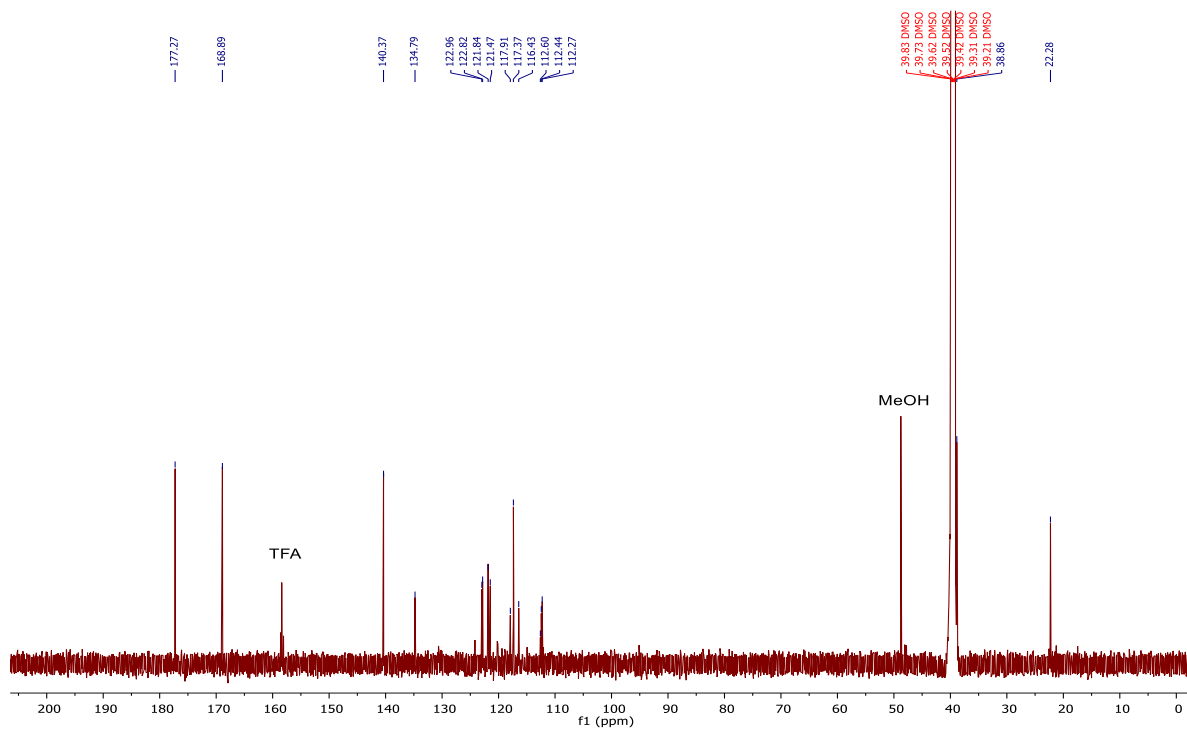

S43: COSY NMR Spectrum for Compound **11** in DMSO- $d_6$

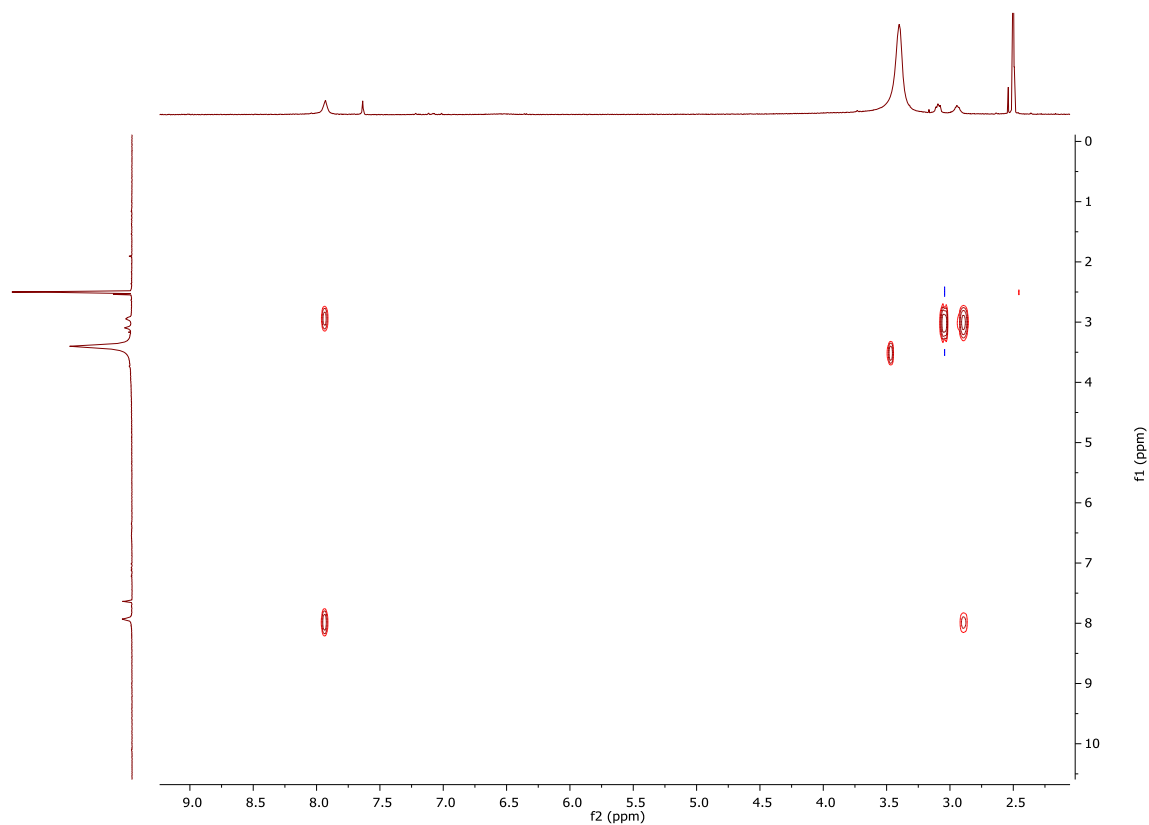

S44: HSQC NMR Spectrum for Compound **11** in DMSO- $d_6$

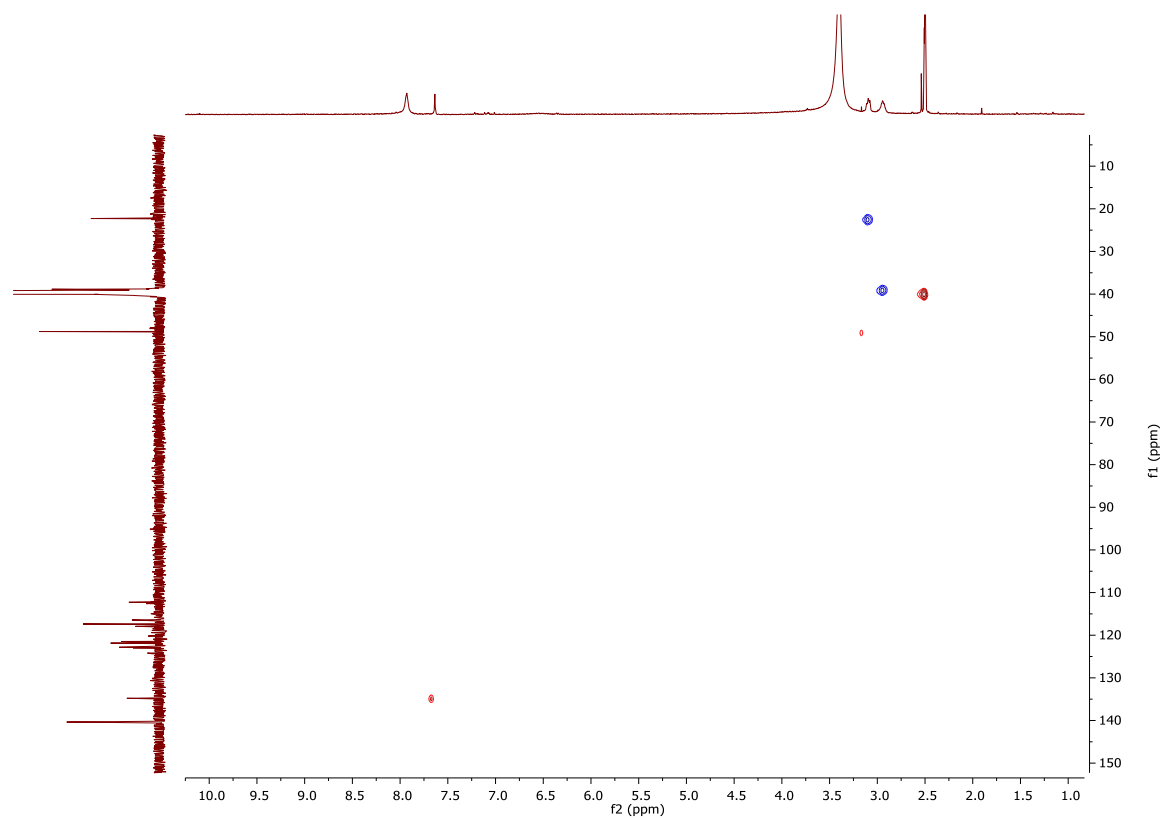

S45: HMBC NMR Spectrum for Compound **11** in DMSO-*d*<sub>6</sub>

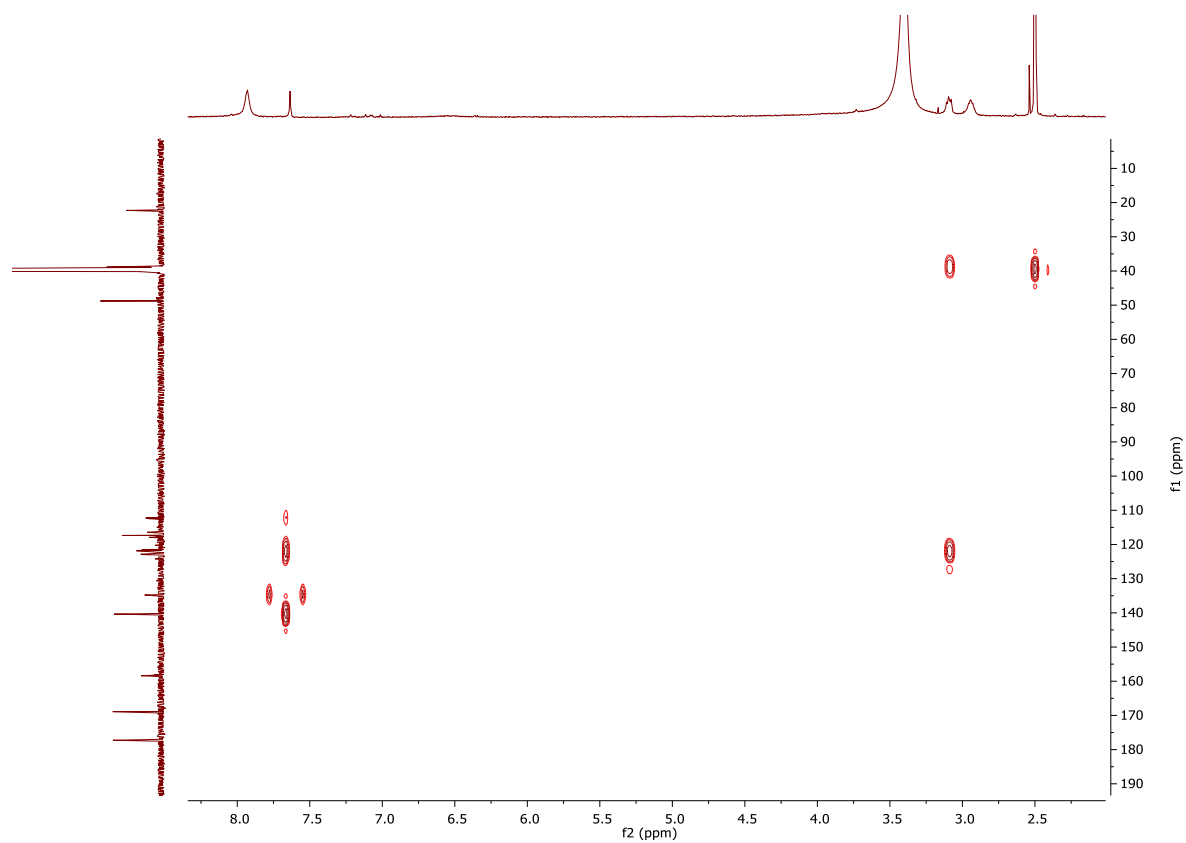

**S46:** Synthetic Route for Thiaplakortone A (HCl Salt)<sup>1</sup>

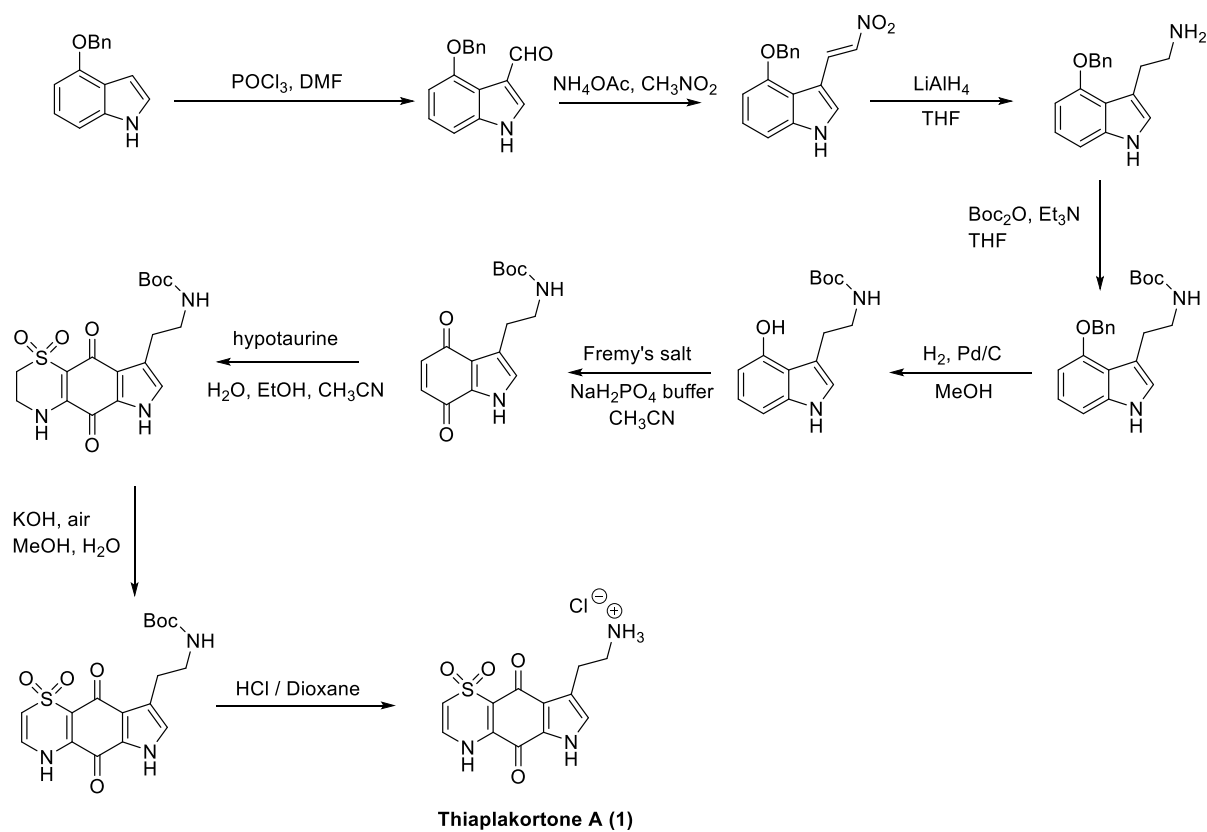

1. Pouwer, R. H.; Deydier, S. M.; Le, P. V.; Schwartz, B. D.; Franken, N. C.; Davis, R. A.; Coster, M. J.; Charman, S. A.; Edstein, M. D.; Skinner-Adams, T. S.; Andrews, K. T.; Jenkins, I. D.; J. Quinn, R. J. Total synthesis of thiaplakortone A: derivatives as metabolically stable leads for the treatment of malaria. *ACS Med. Chem. Lett.* **2014**, *5*, 178–182.
